# Supplementary material for: Palladium-catalyzed chemoselective synthesis of indane-1,3-dione derivatives via tert-butyl isocyanide insertion
Source: Royal Society of Chemistry journal article supplement (doi:10.1039/c5ob00472a), 2015-01-01

## Electronic Supplementary Information

### **Palladium-catalyzed chemoselective synthesis of indane-1,3 -dione derivatives via *tert*-butyl isocyanide insertion**

Huaqing Duan,<sup>a</sup> Zhong Chen<sup>a</sup>, Li Han<sup>b</sup>, Yulin Feng<sup>c</sup>, Yongming Zhu<sup>\*a</sup> and Shilin Yang<sup>\*a</sup>

<sup>a</sup> College of Pharmaceutical Science, Soochow University, 199 Ren-ai Road, Suzhou 215123, China.

<sup>b</sup> Zhang Zhongjing College of Chinese Medicine, Nanyang Institute of Technology, 80 Changjiang Road, Nanyang 473000, China.

<sup>c</sup> Jiangxi University of Traditional Chinese Medicine, 56 Yangming Road, Nanchang 330006, China.

E-mail: zhuyongming@suda.edu.cn; yangshilin@suda.edu.cn

# $^1\text{H}$ NMR and $^{13}\text{C}$ NMR spectra

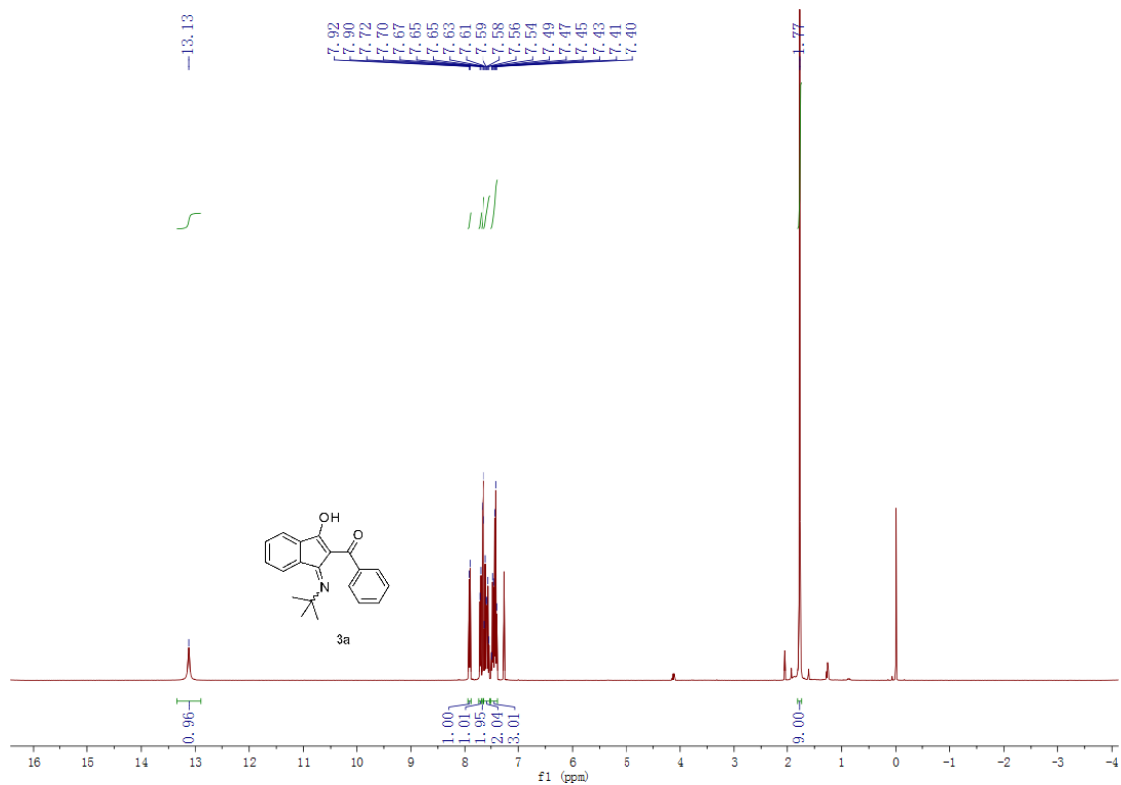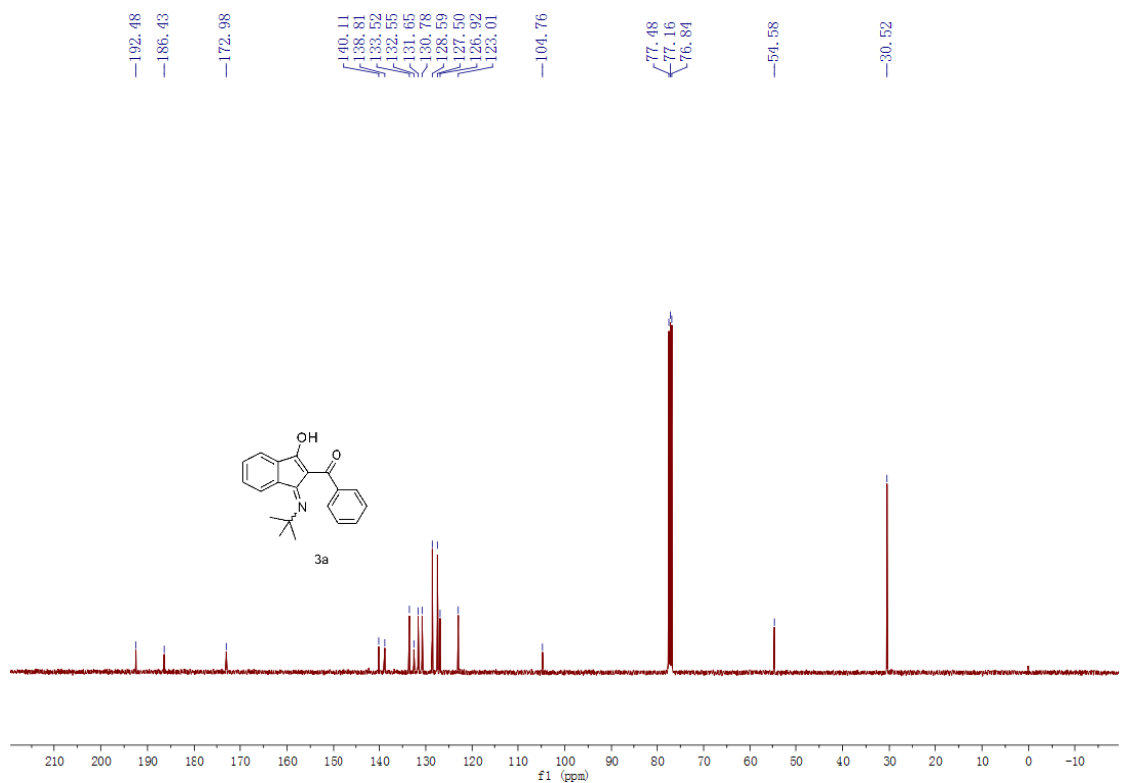

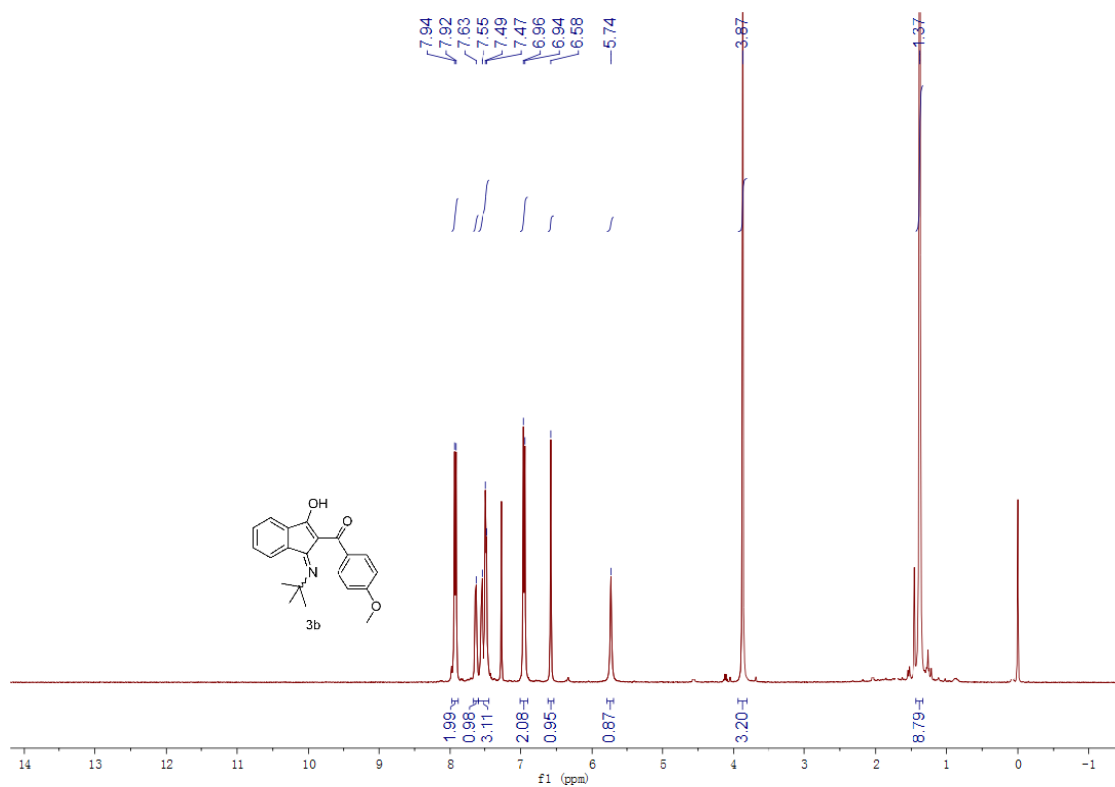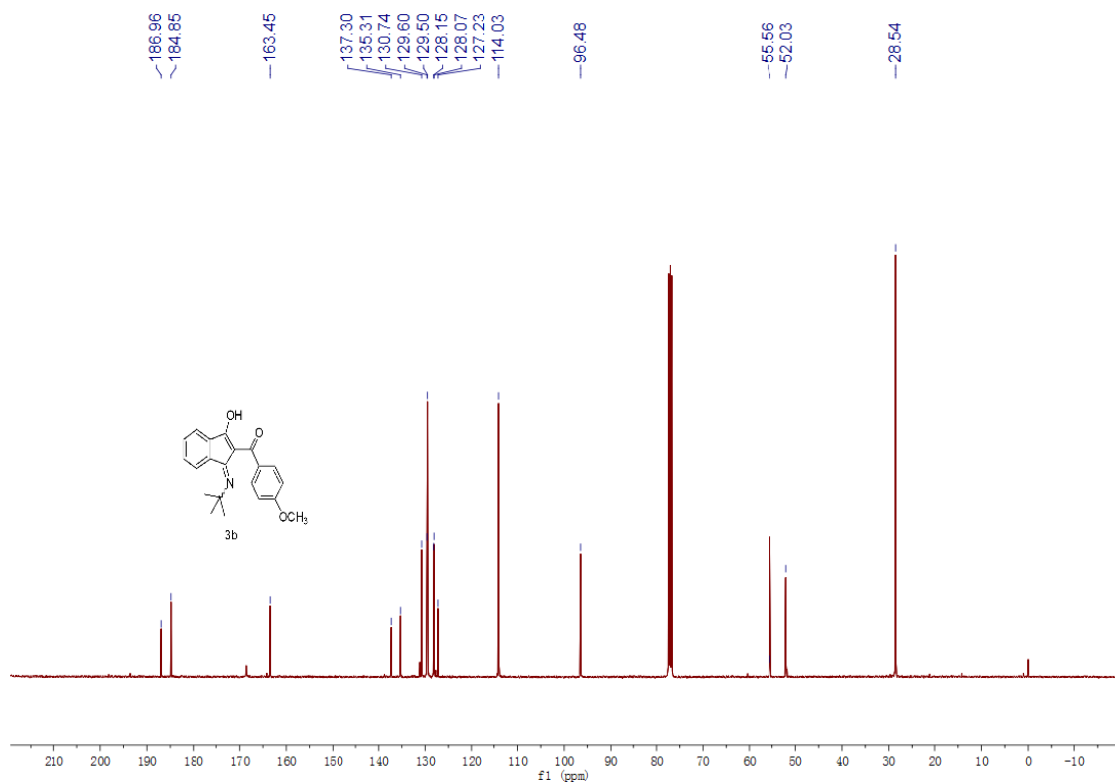

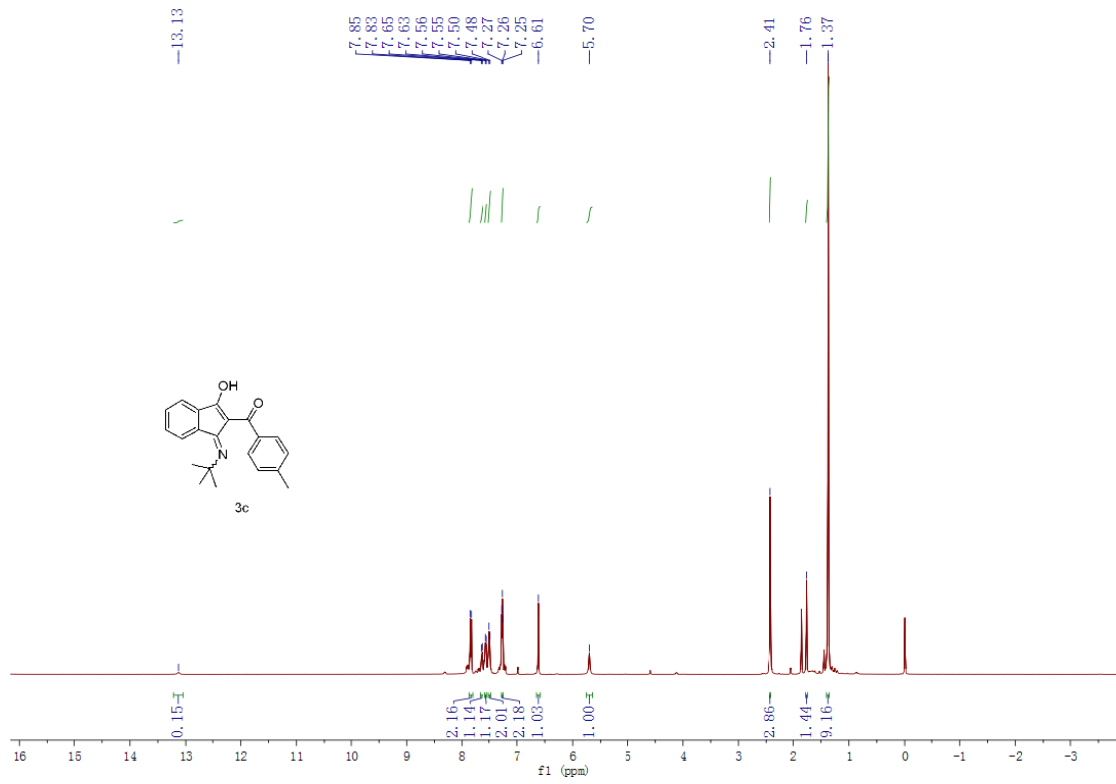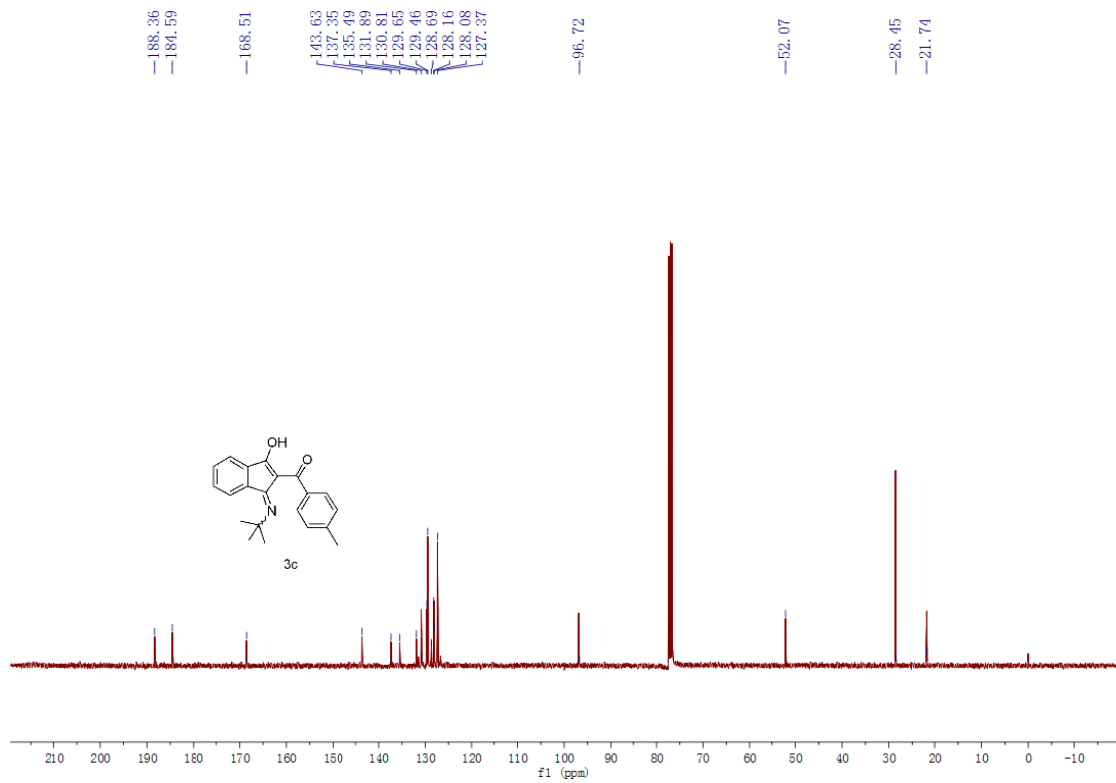

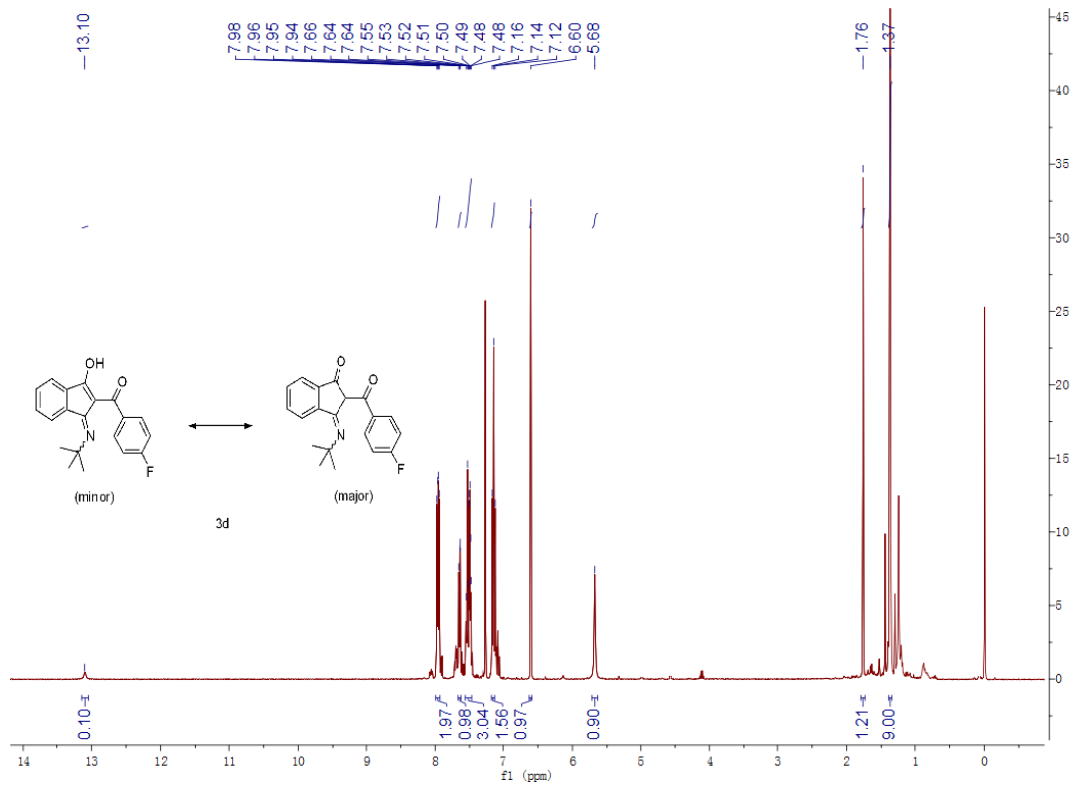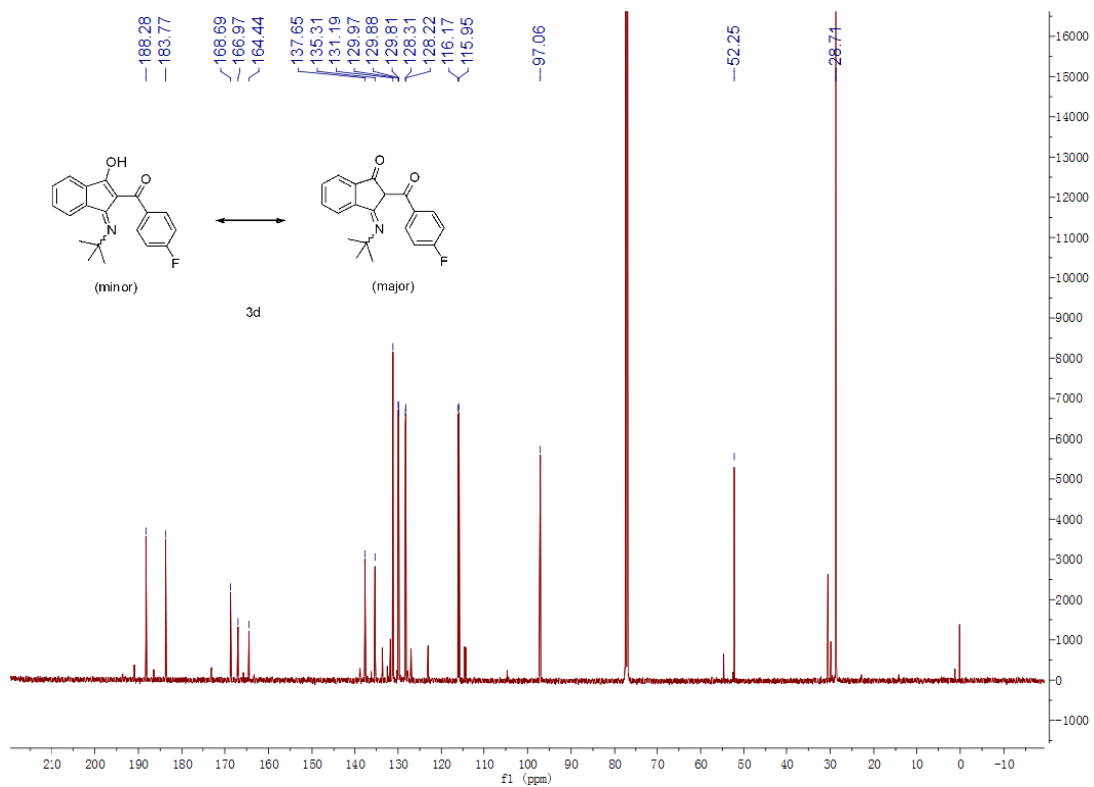

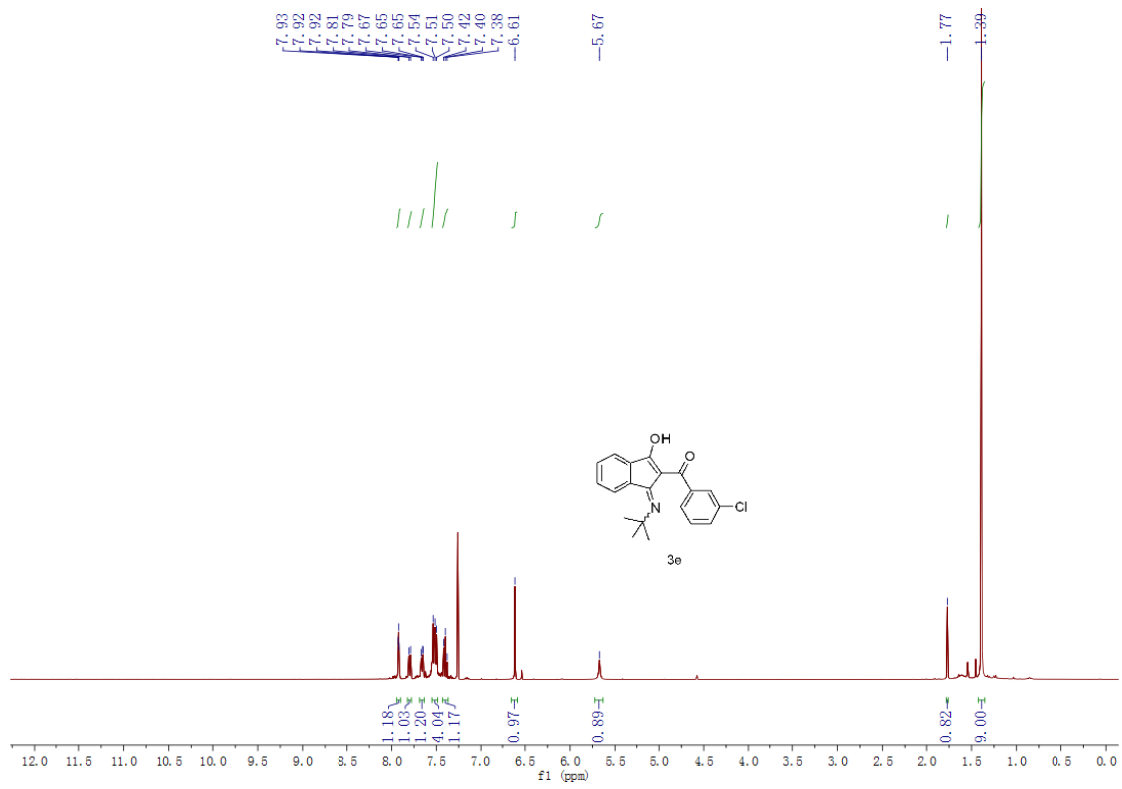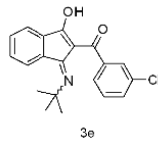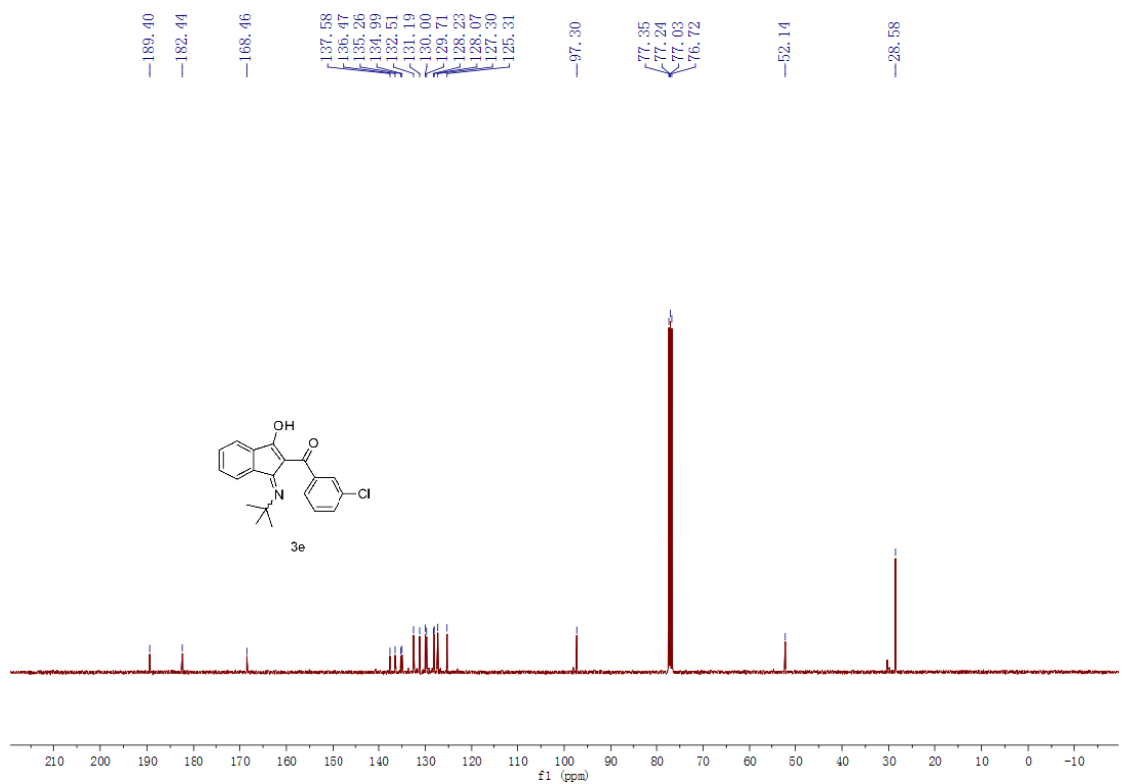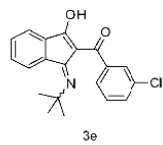

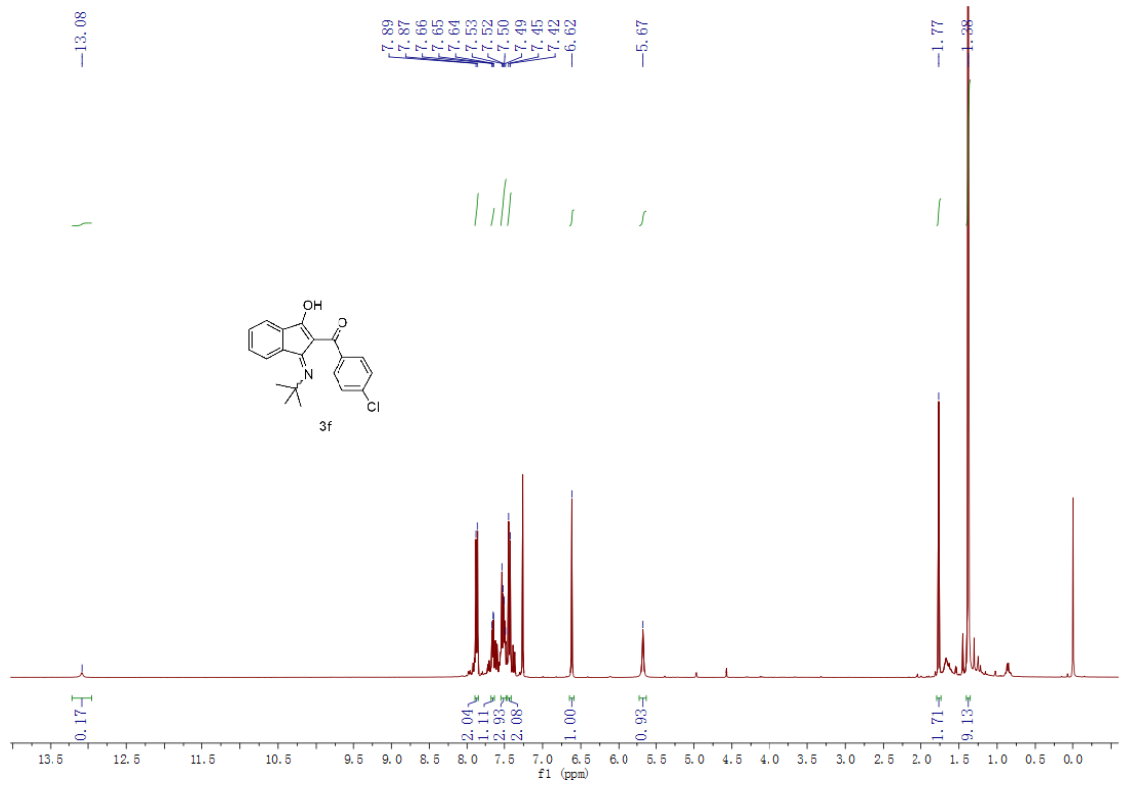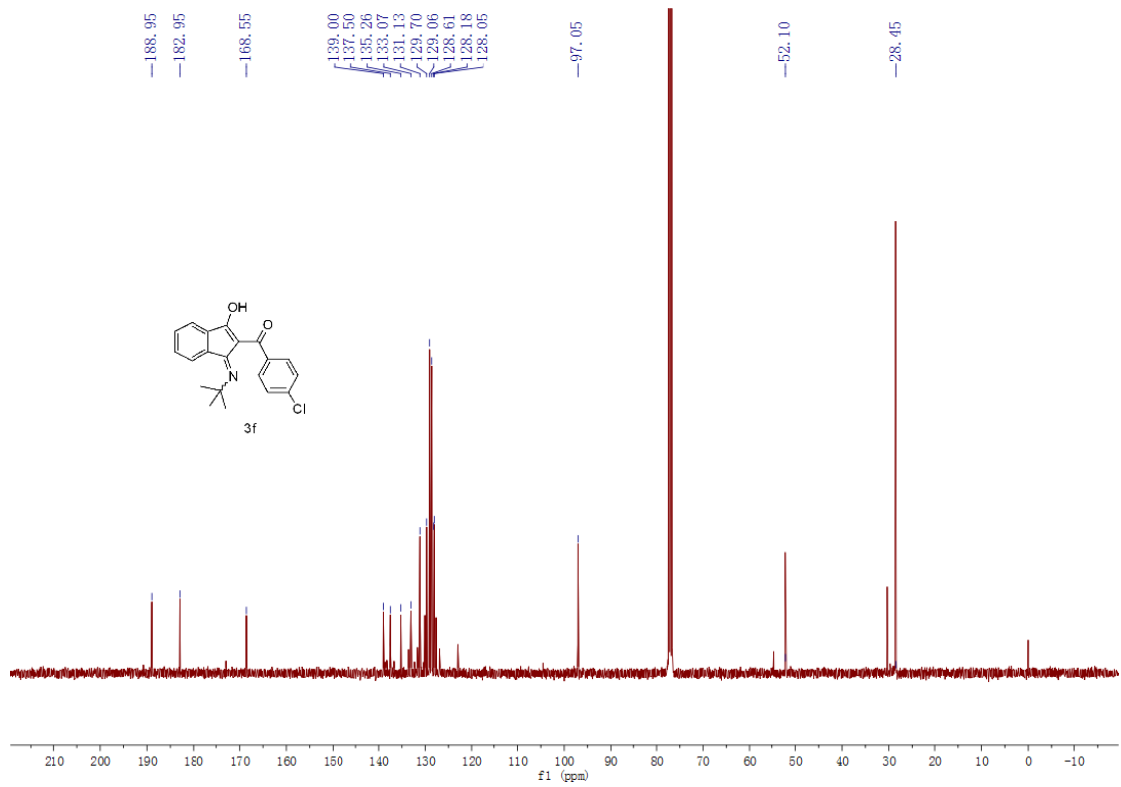

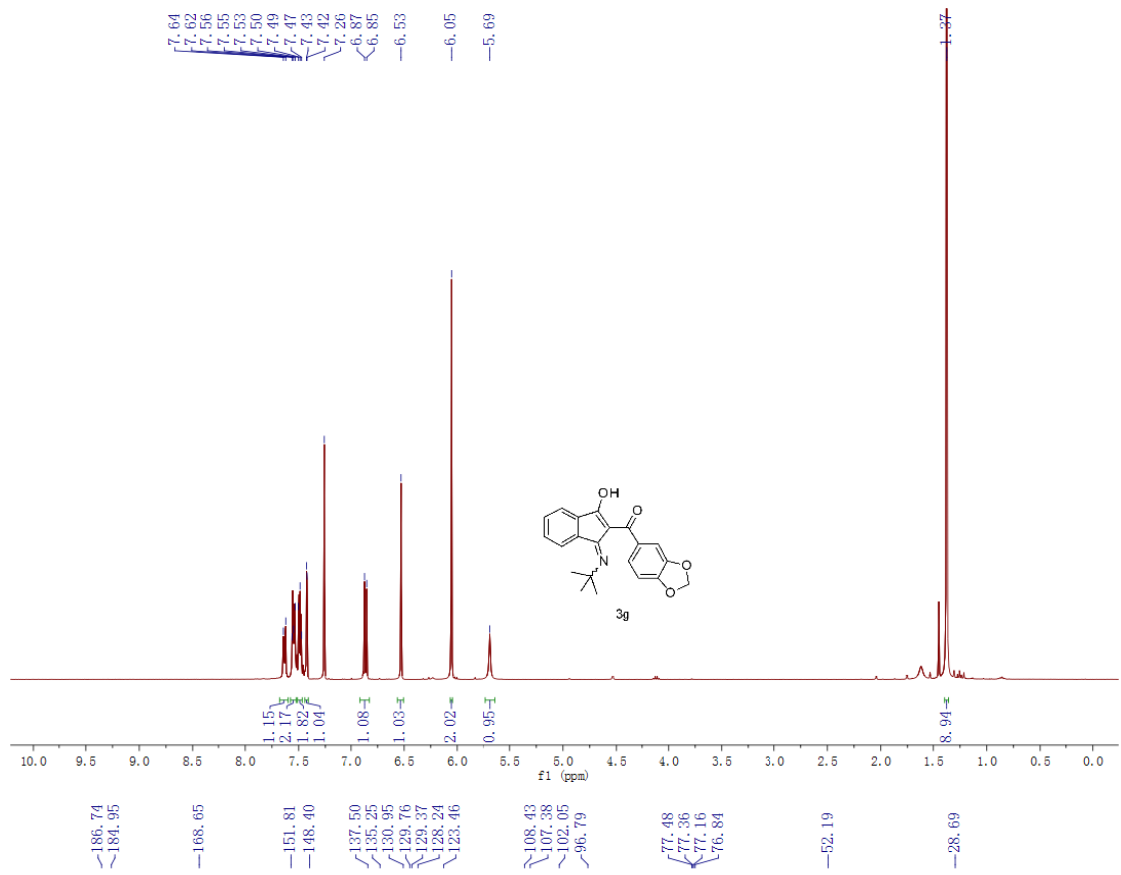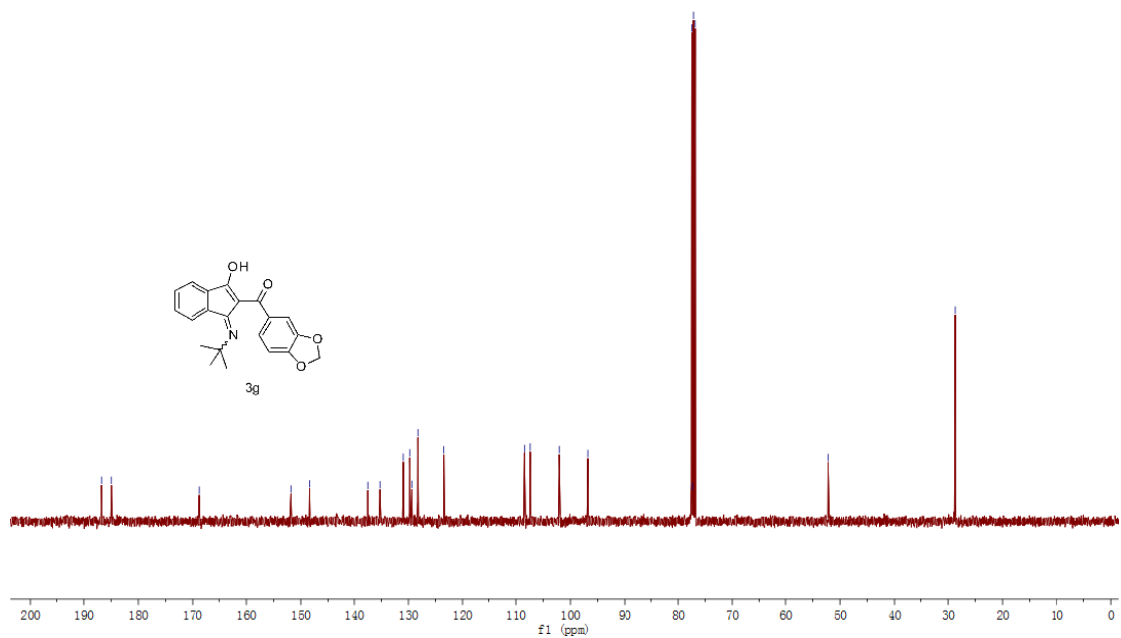



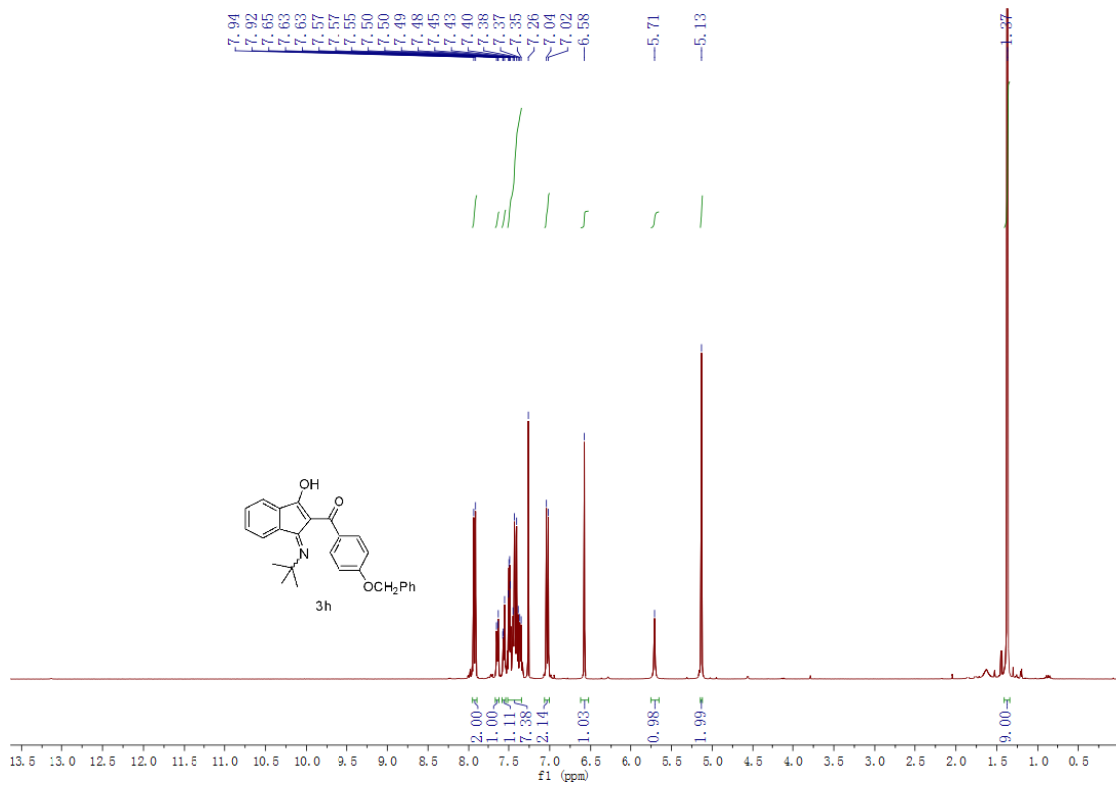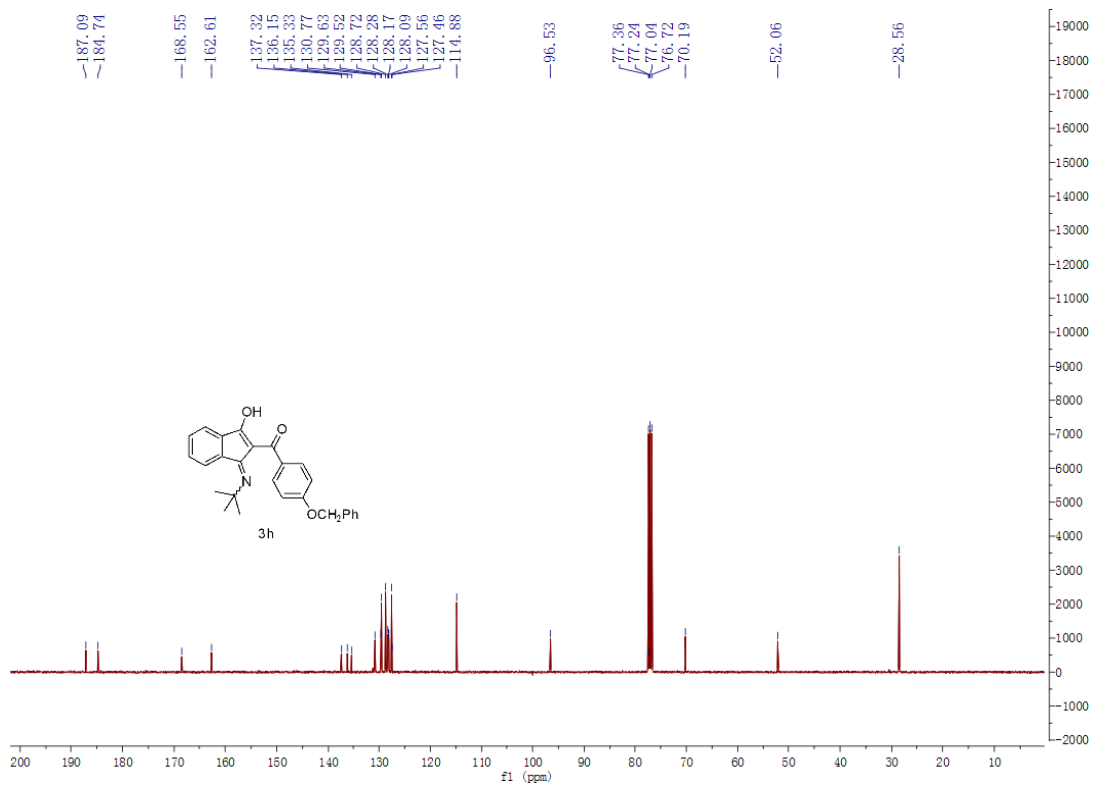

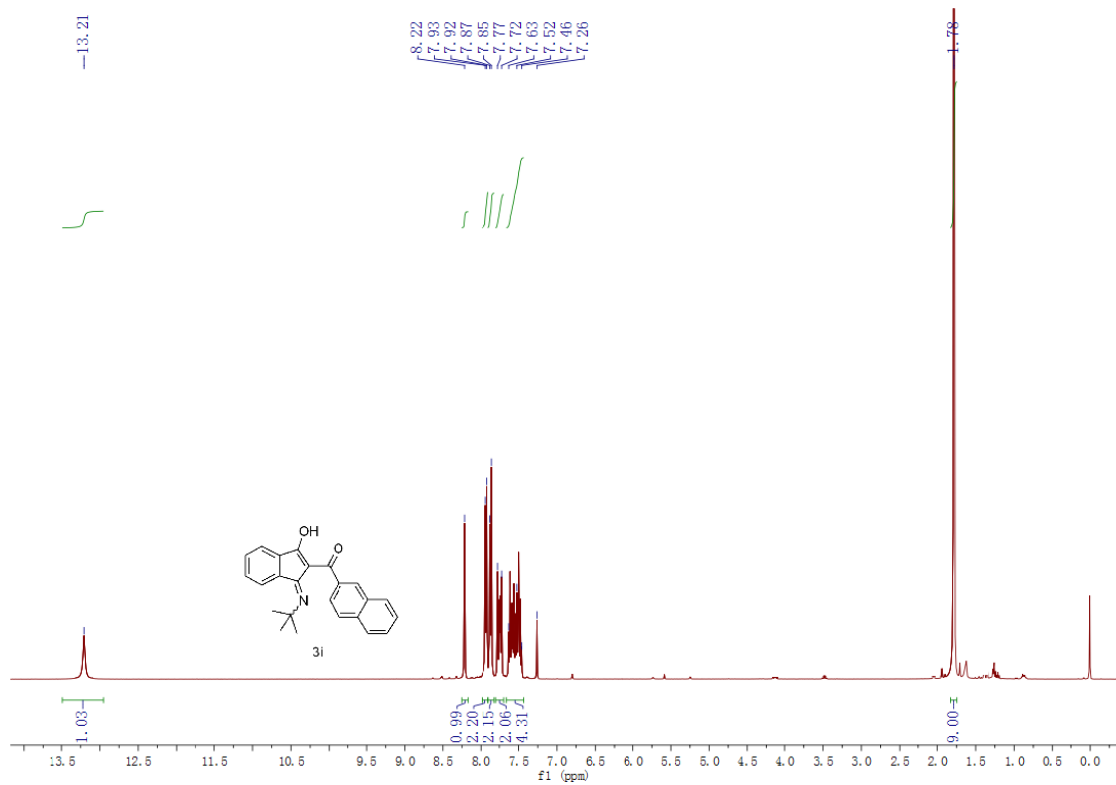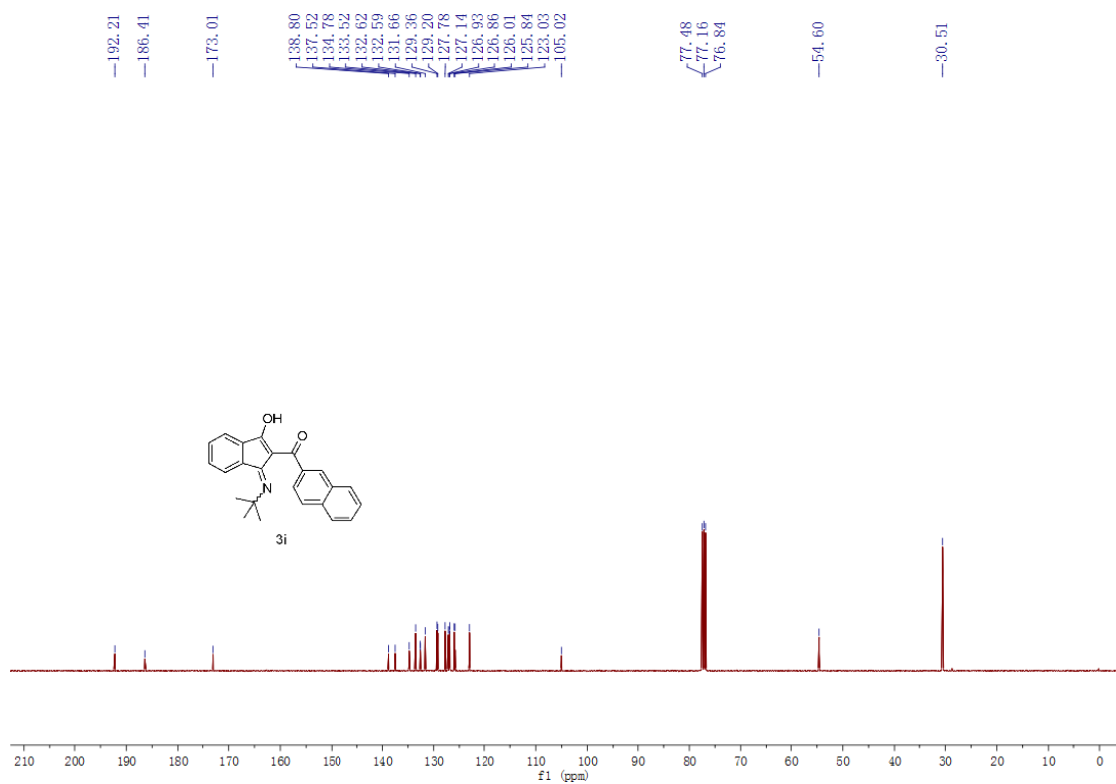

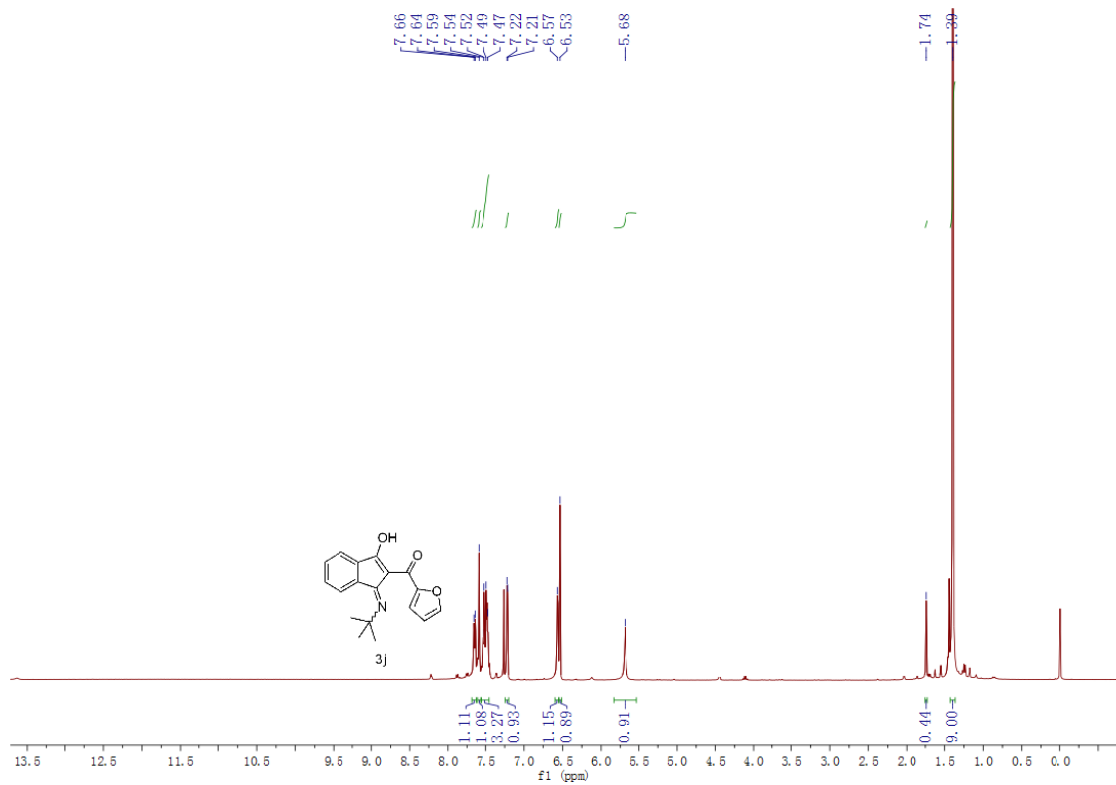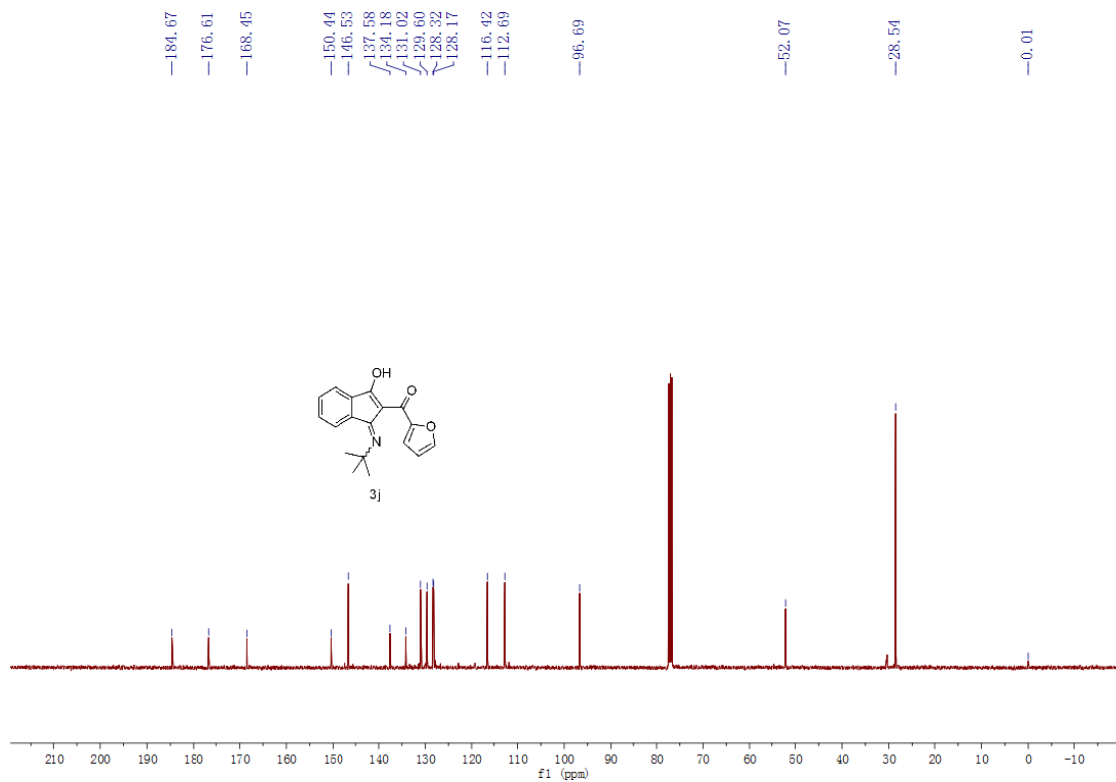

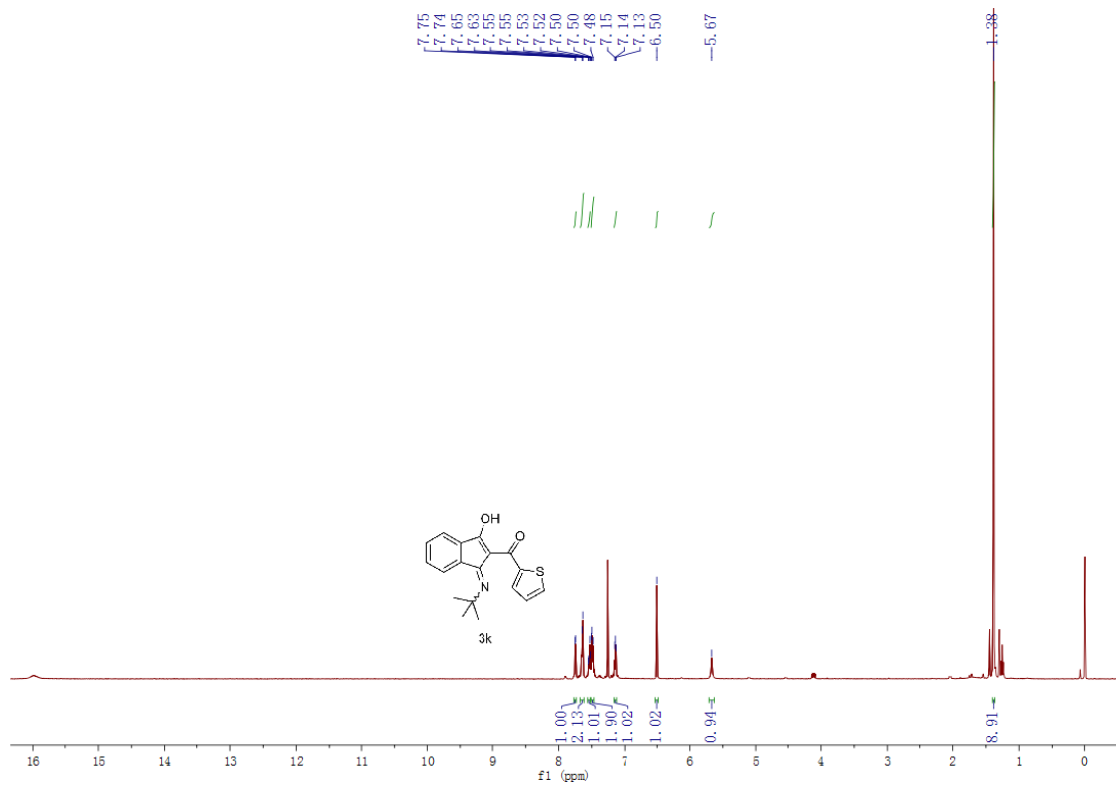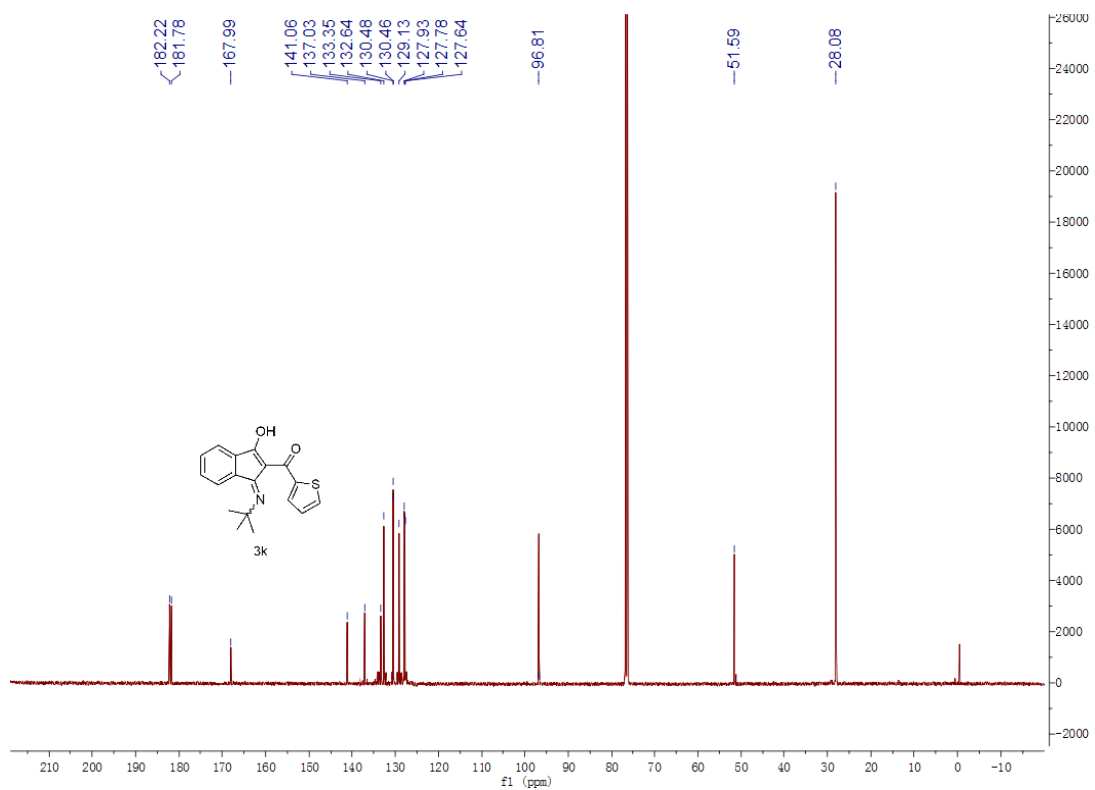

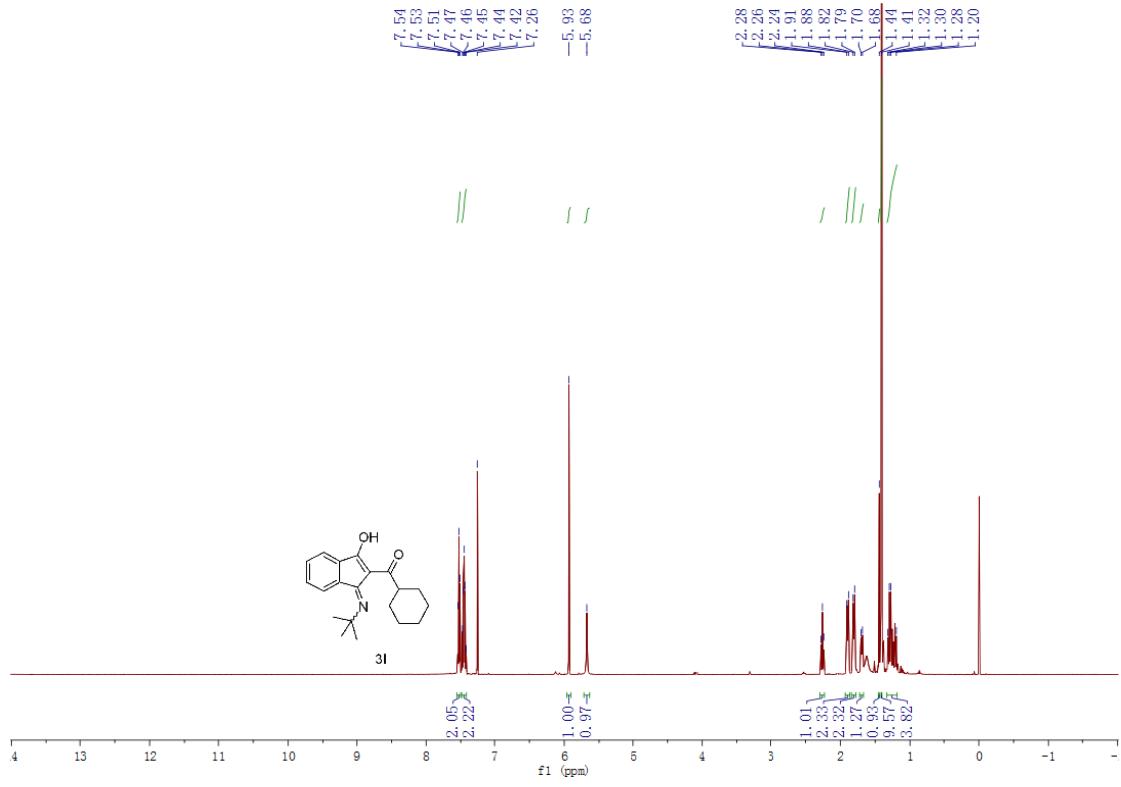

- 198.42
- 187.72
- 168.35
- 137.22
- 135.19
- 130.64
- 129.49
- 128.10
- 127.97
- 98.47
- 51.95
- 45.78
- 29.45
- 28.55
- 25.76
- 25.73
- 0.02

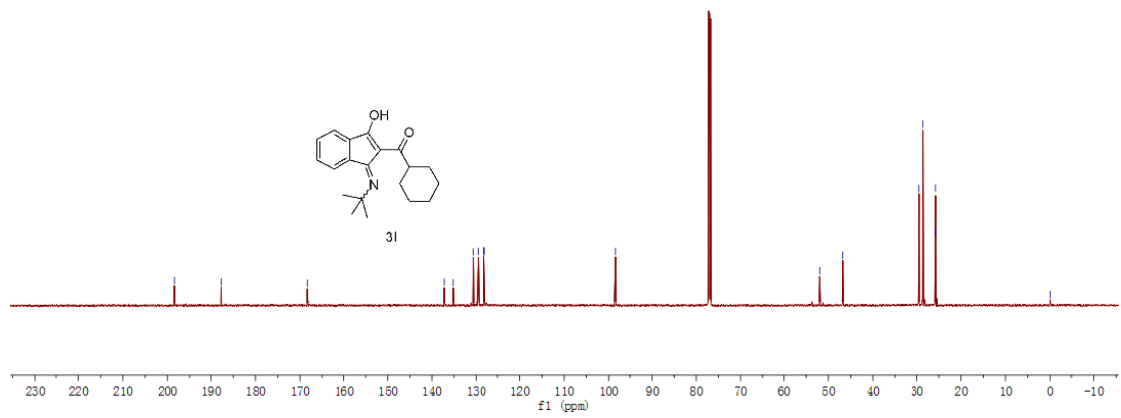

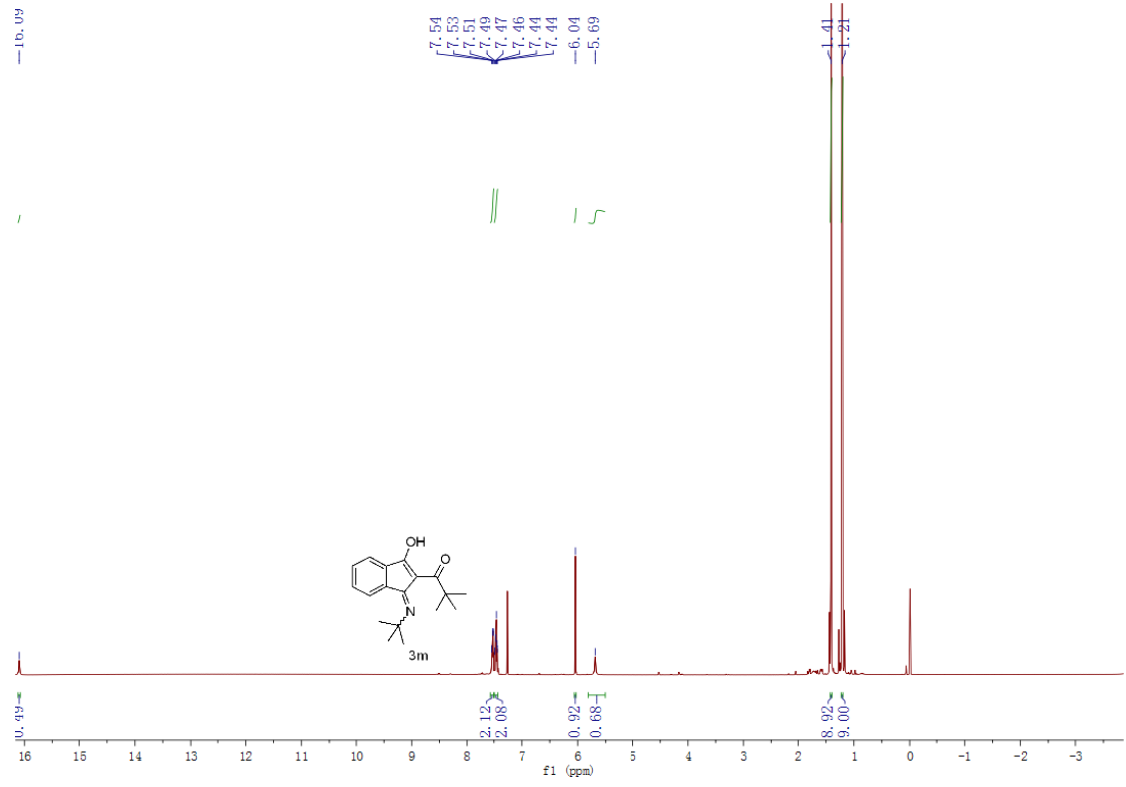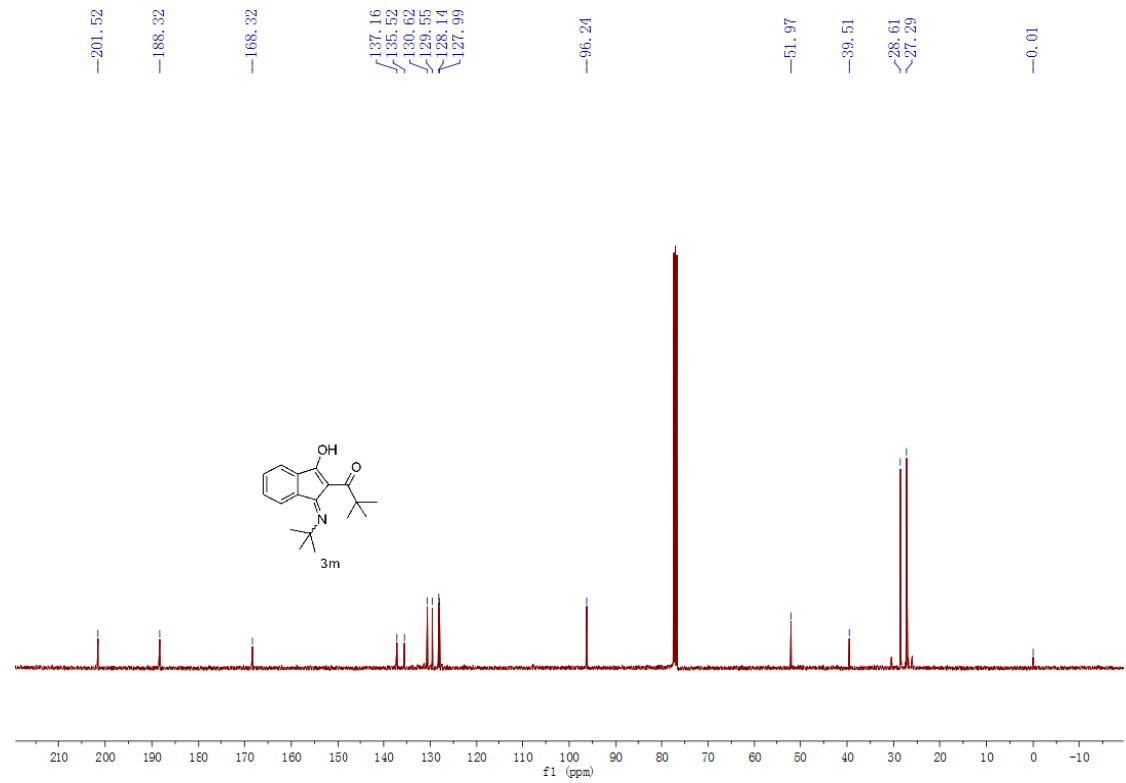

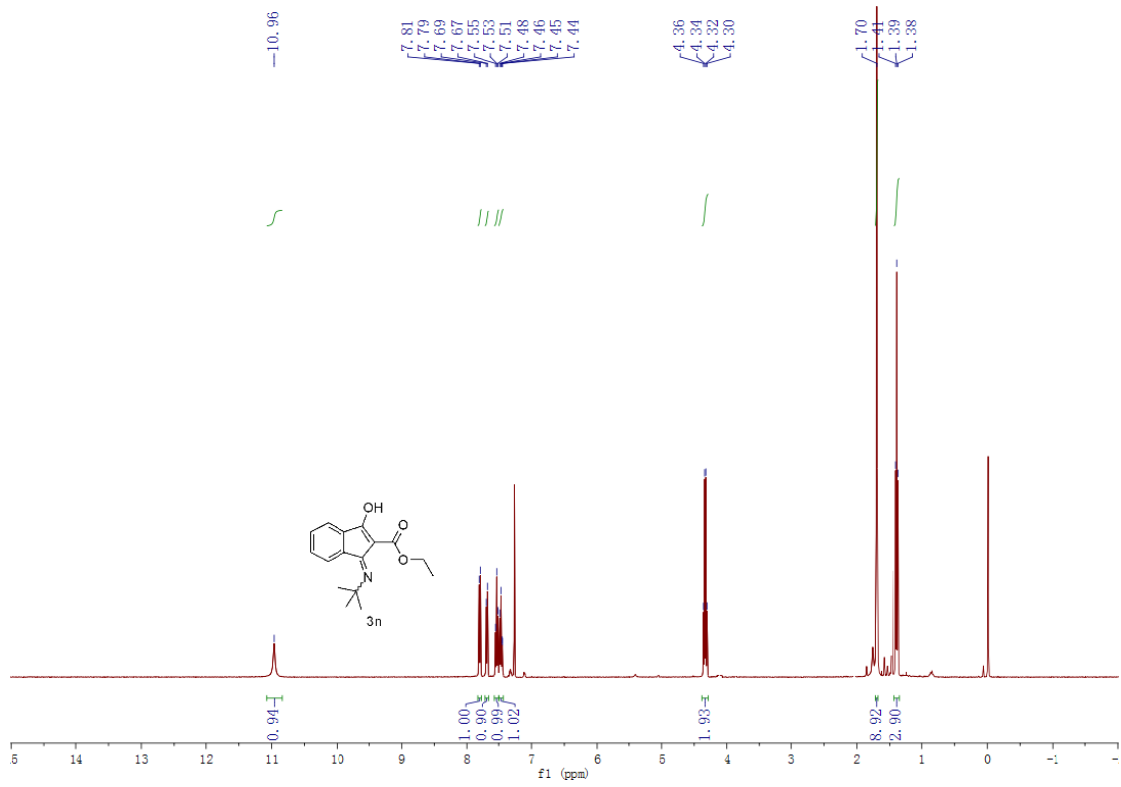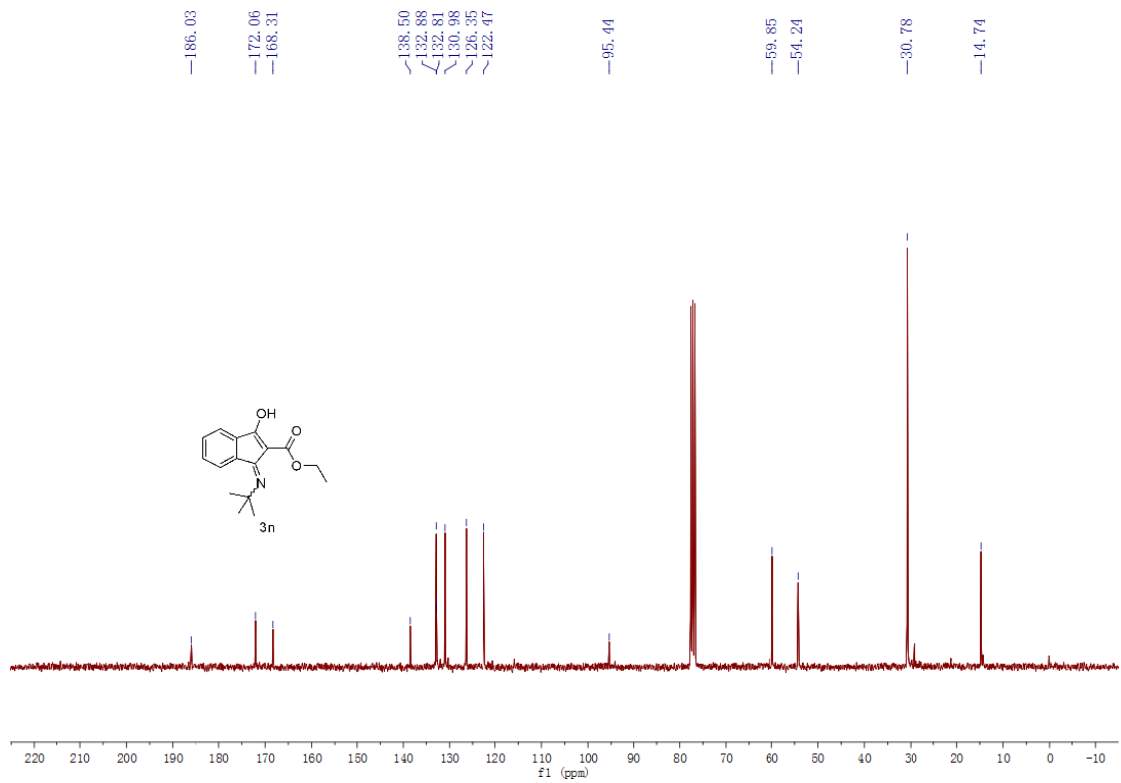

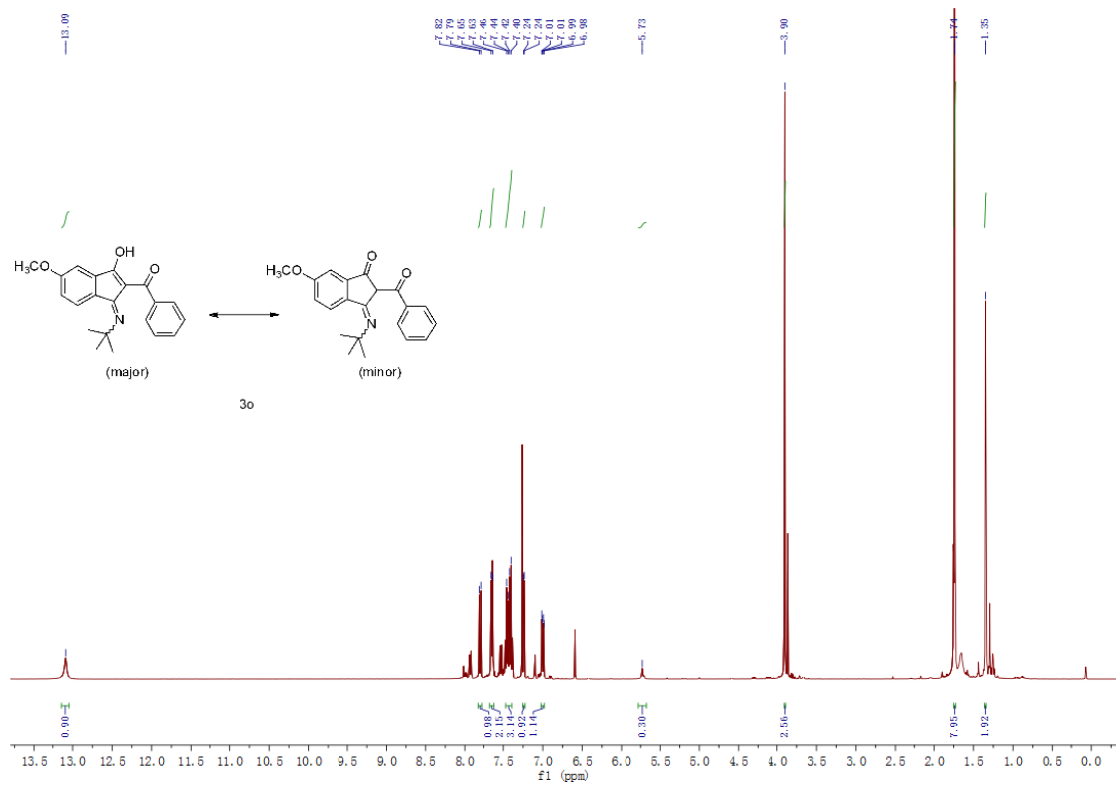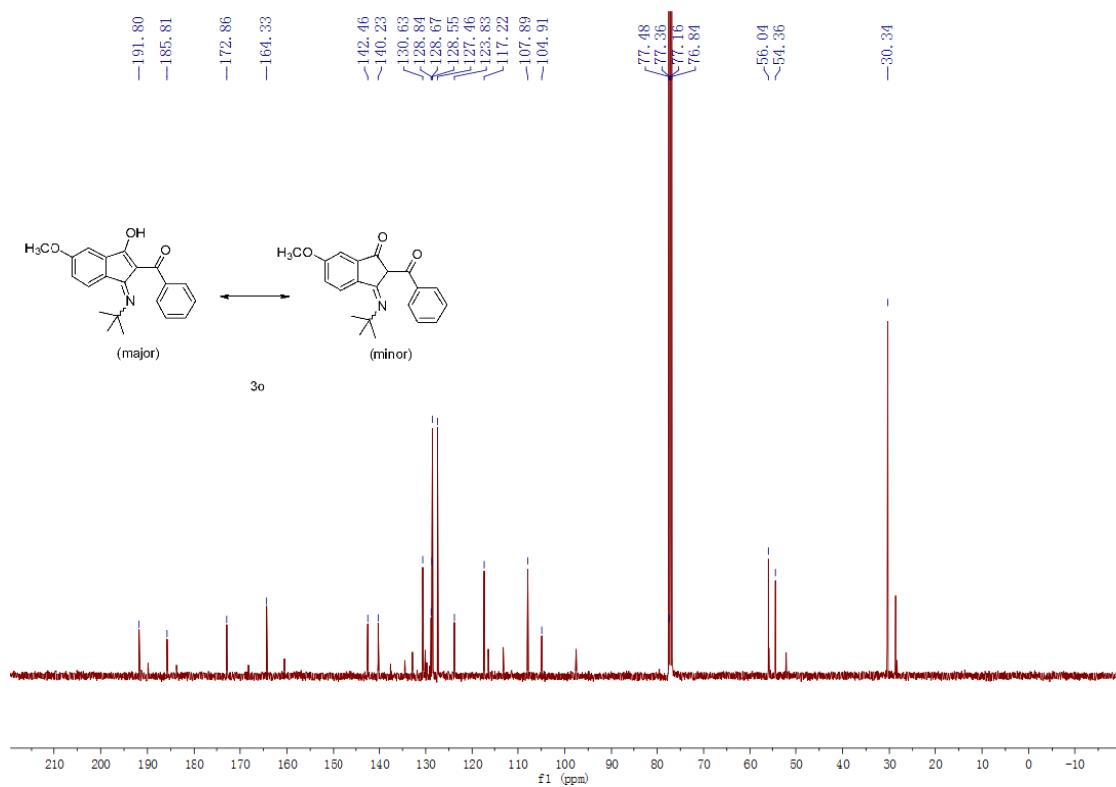



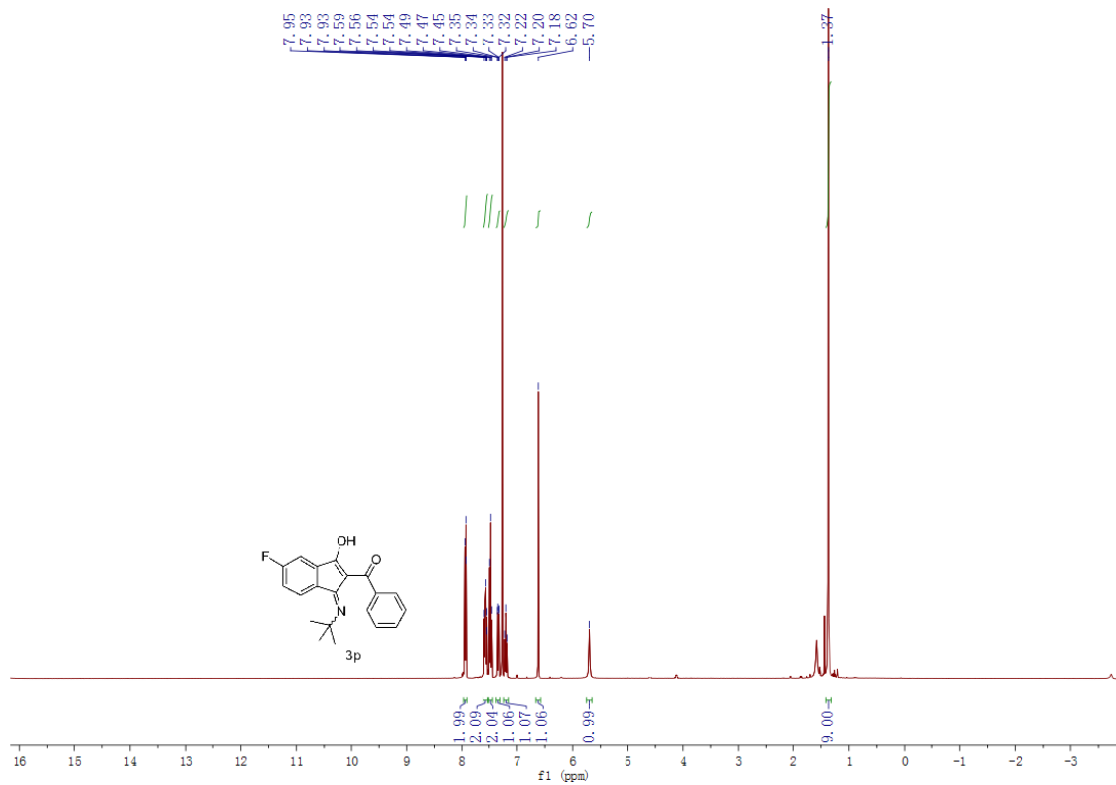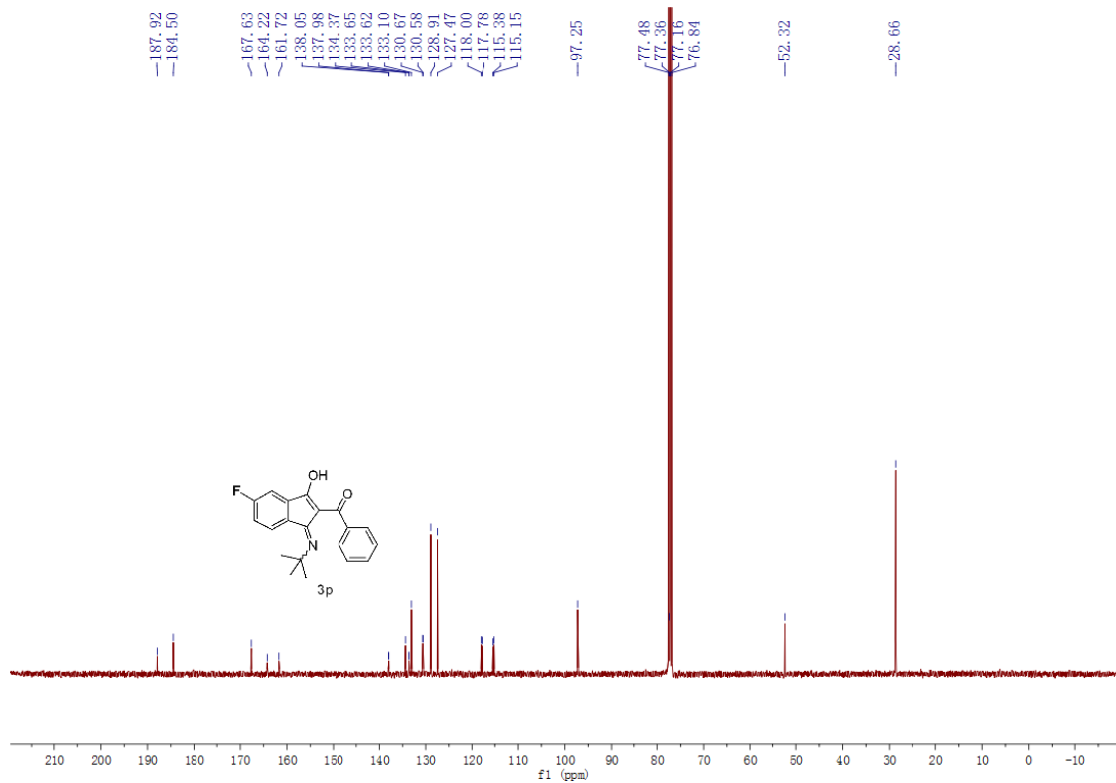

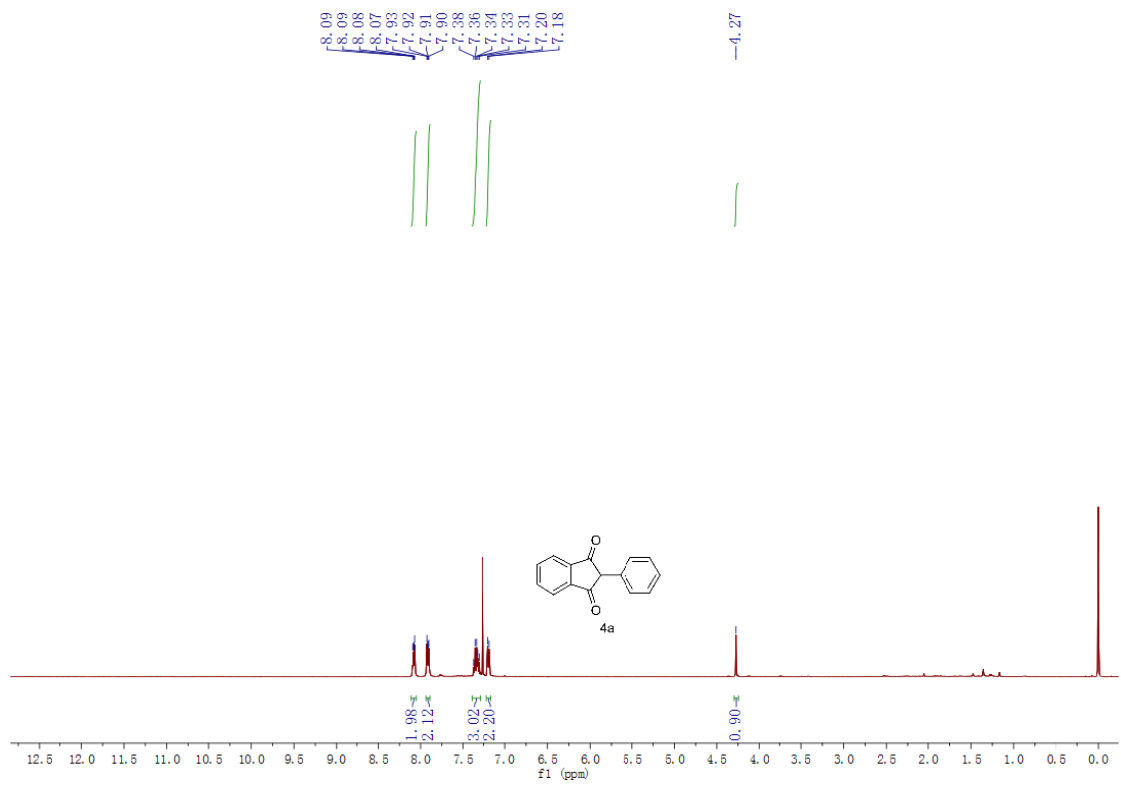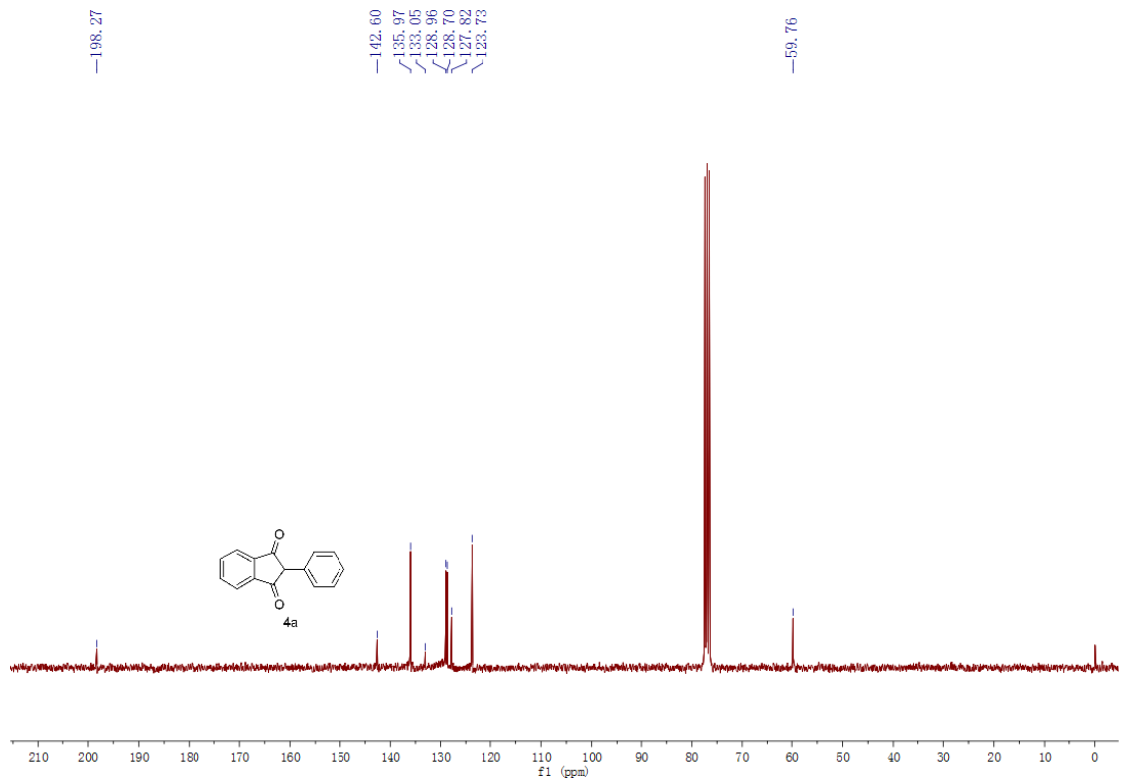

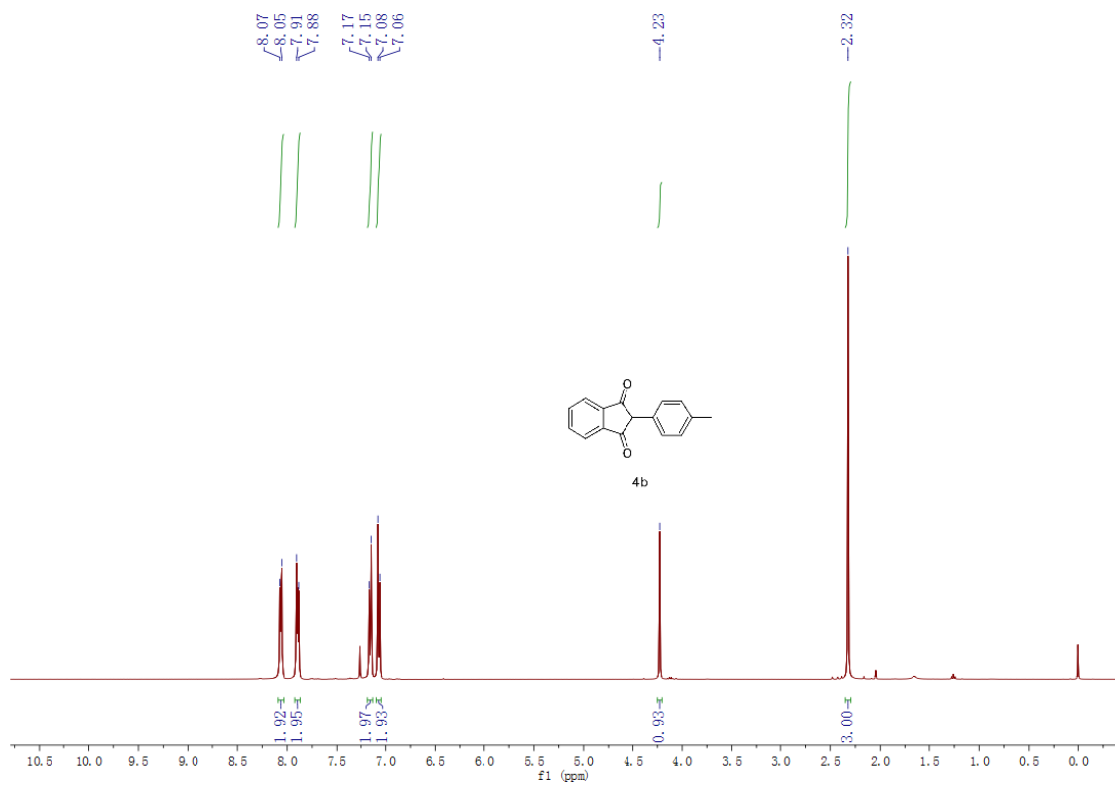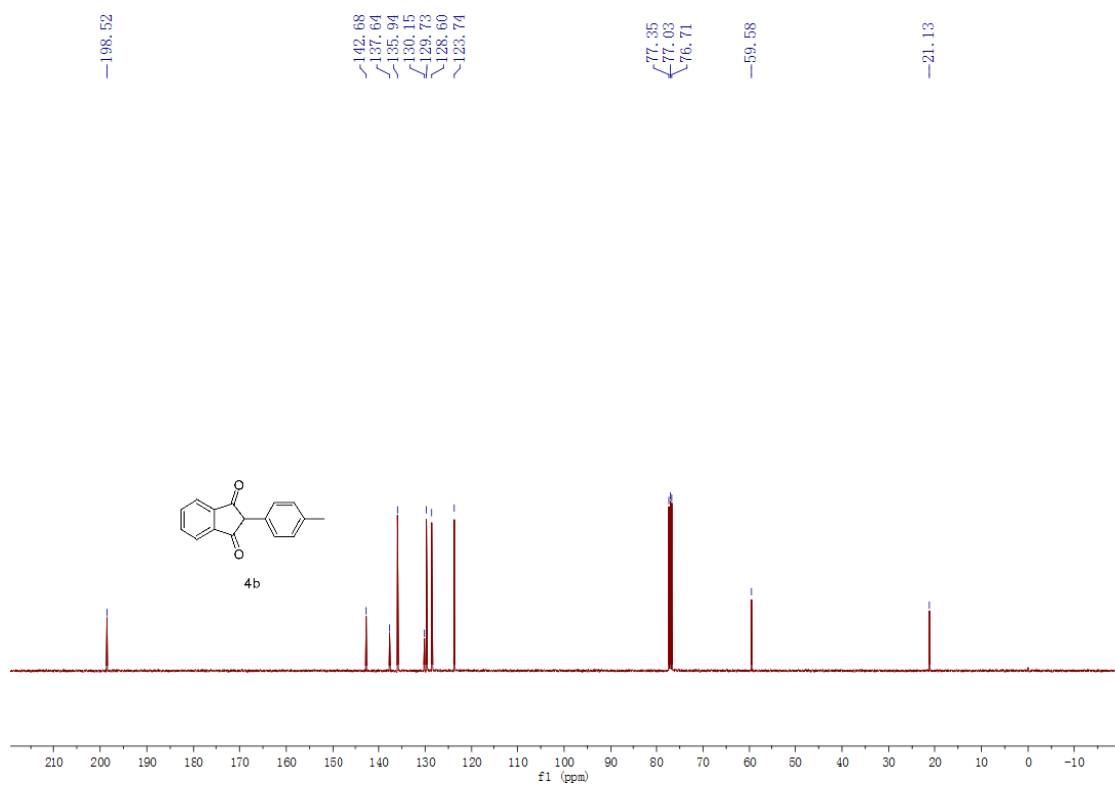

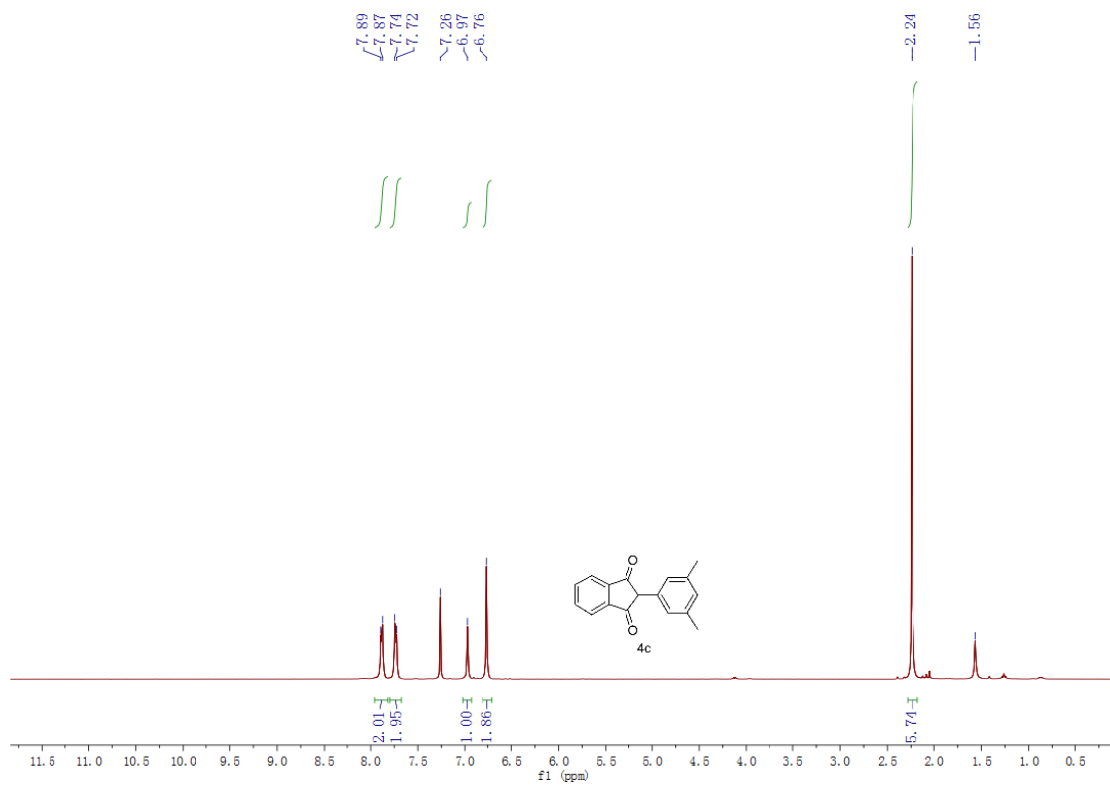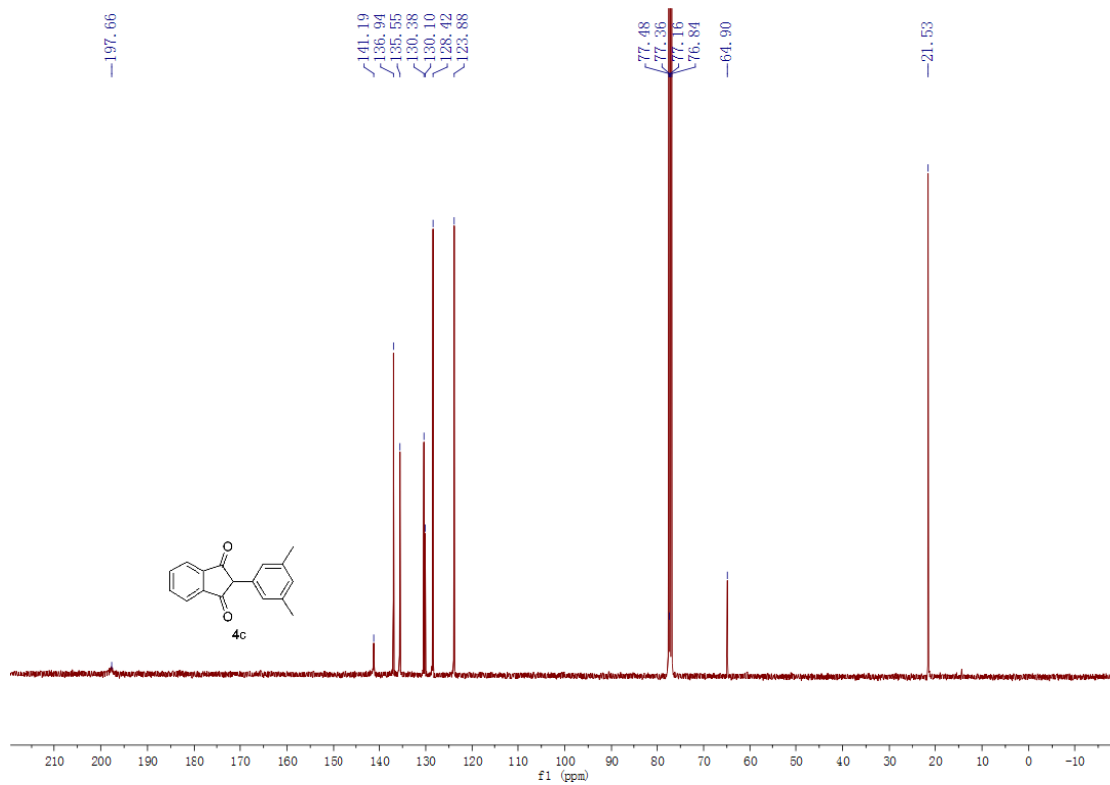

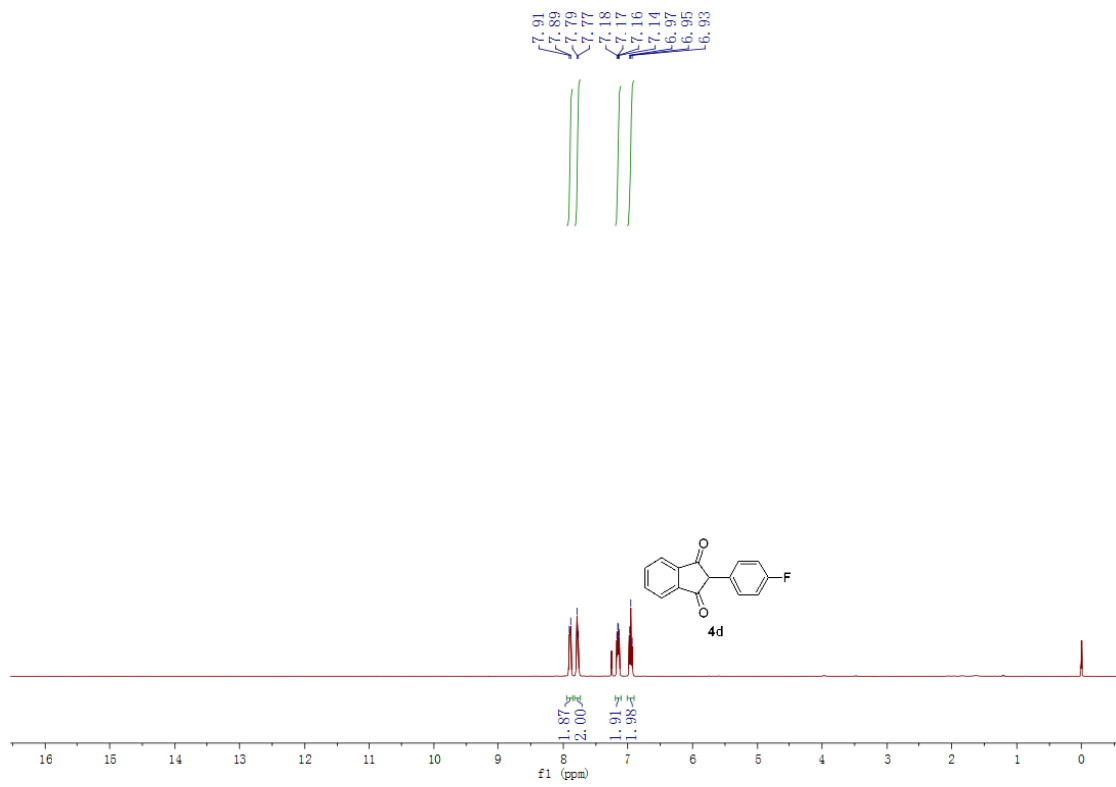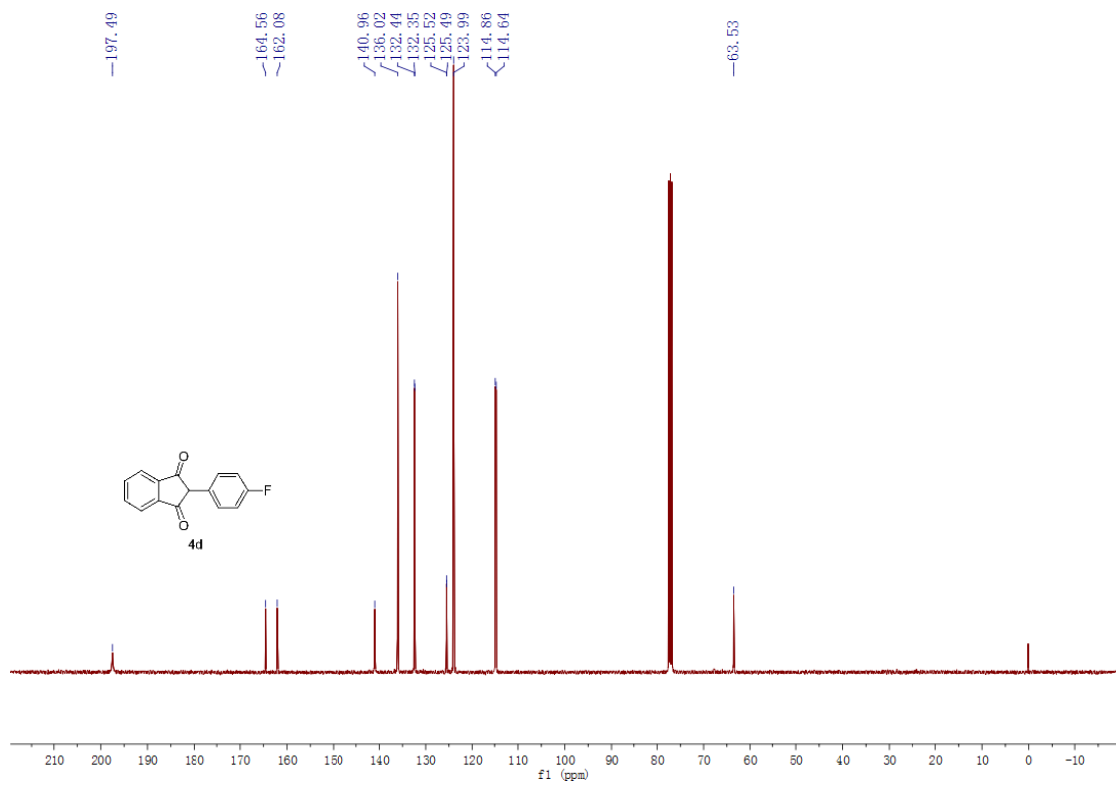

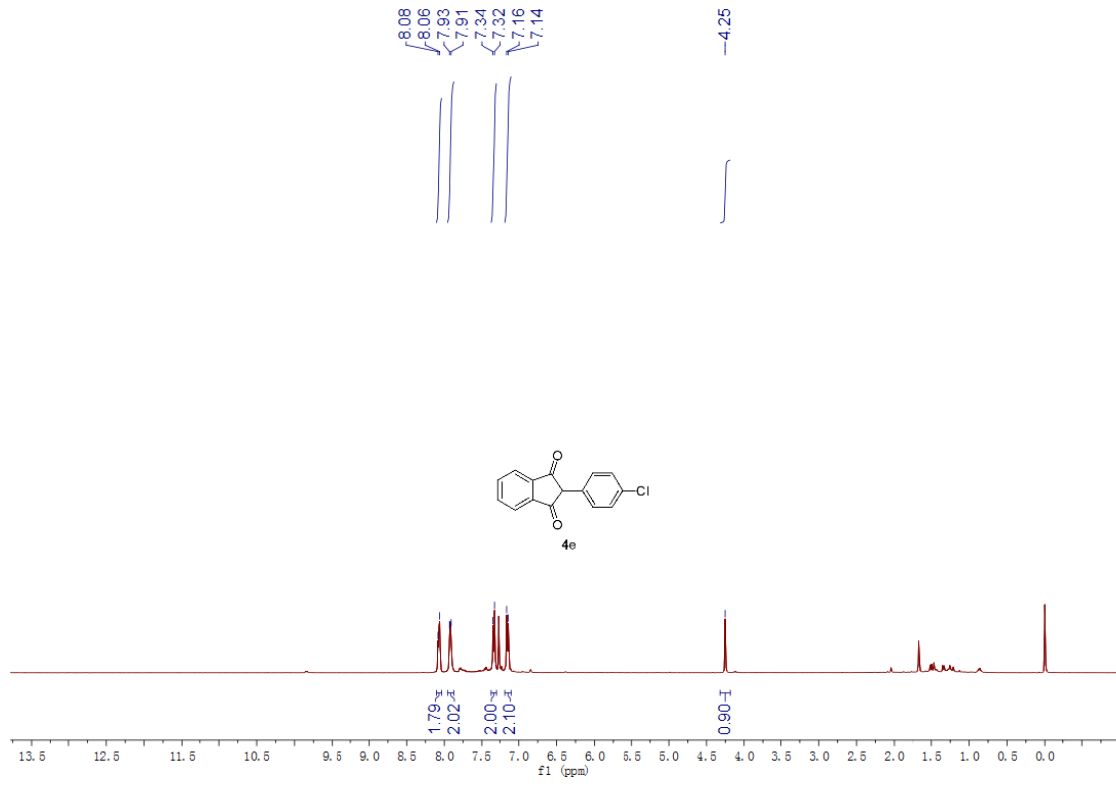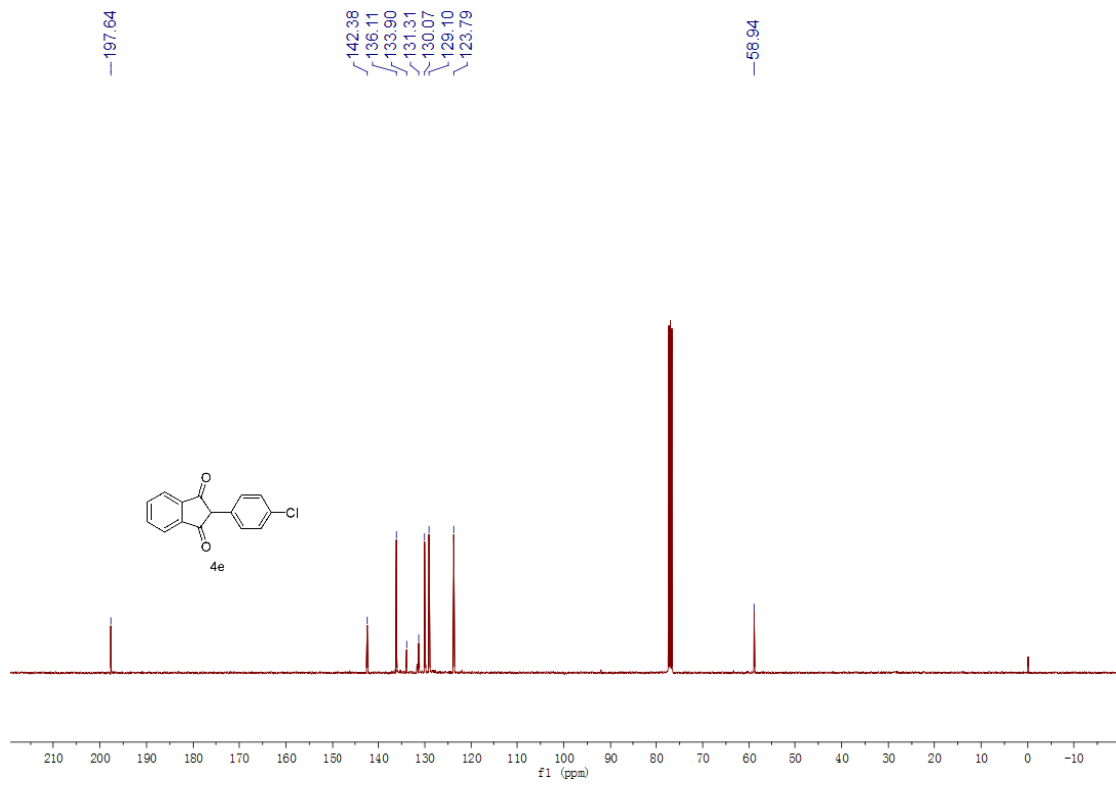

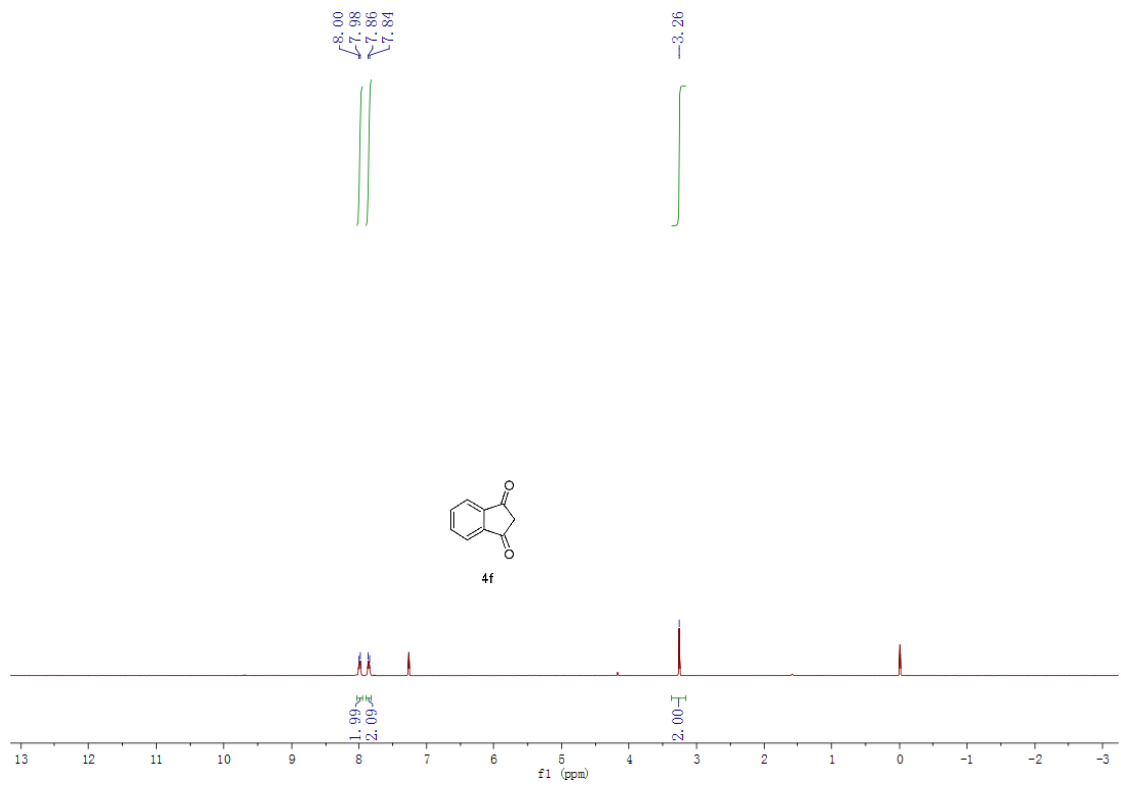

—197.63  
—143.68  
—135.76  
—123.35  
—45.18

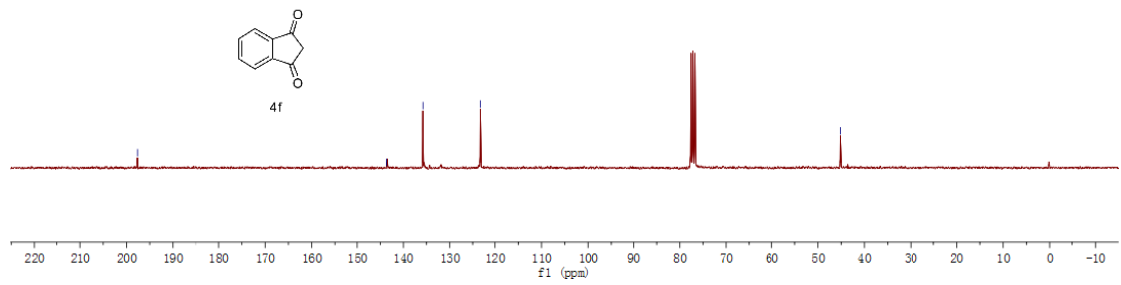

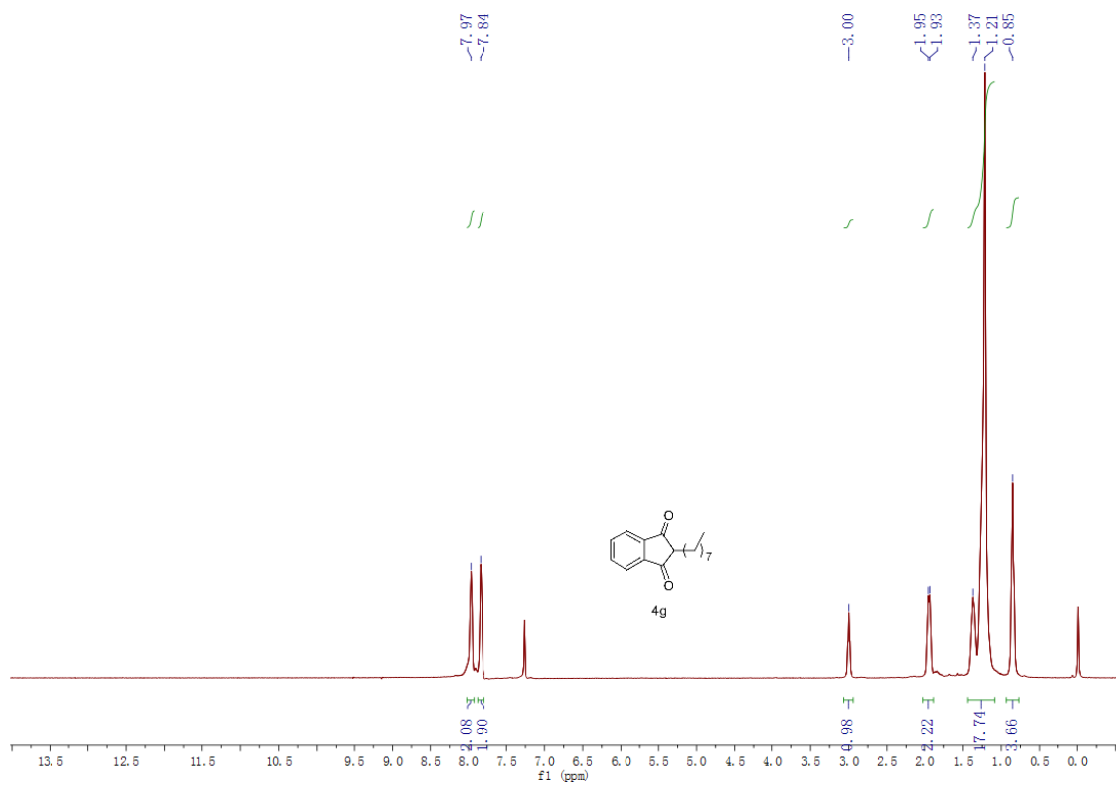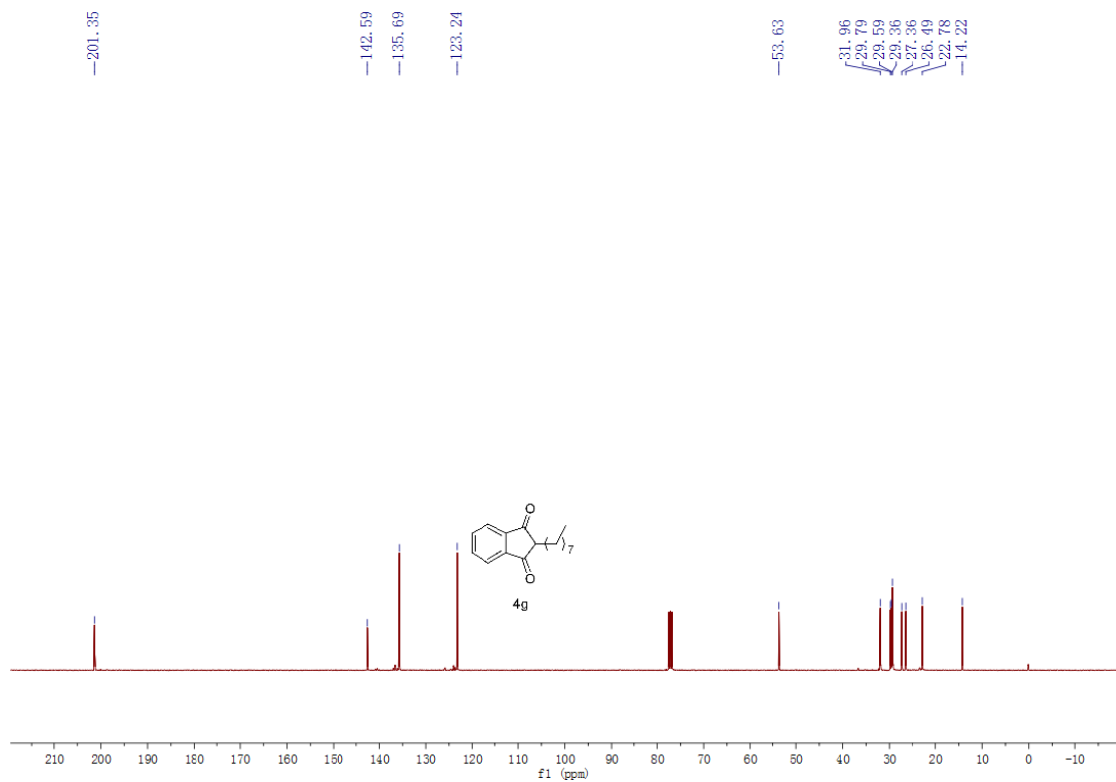



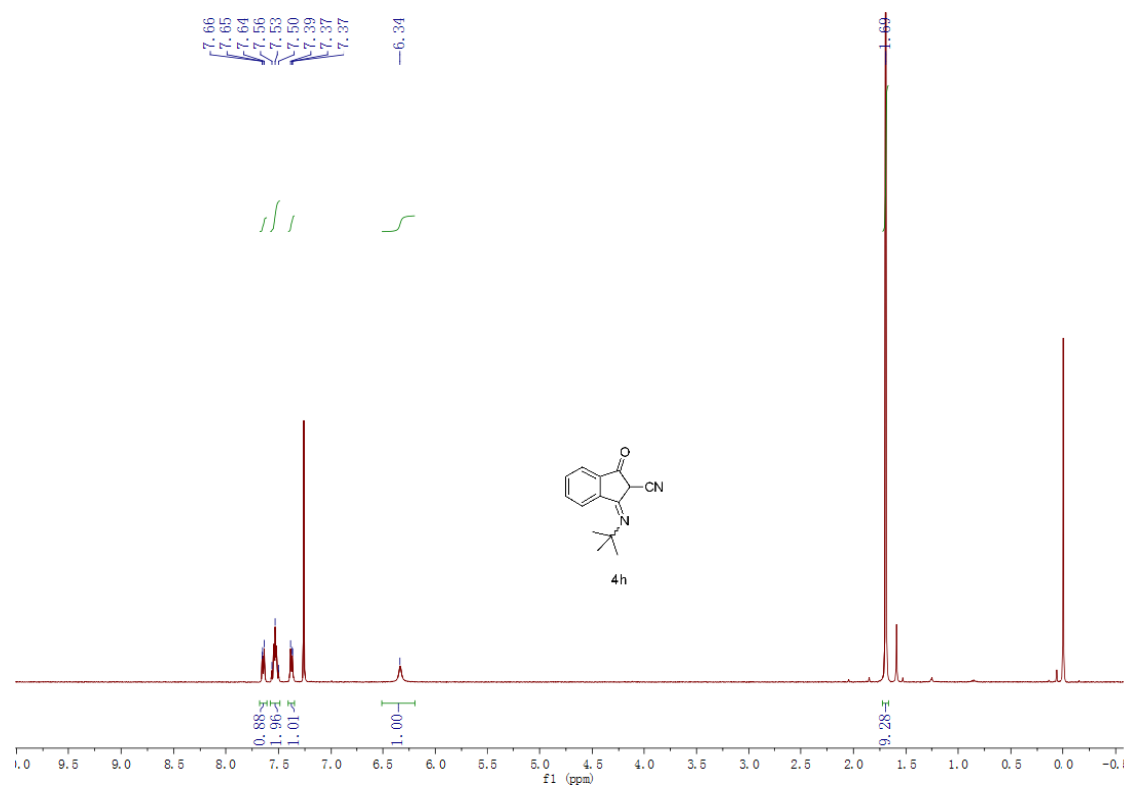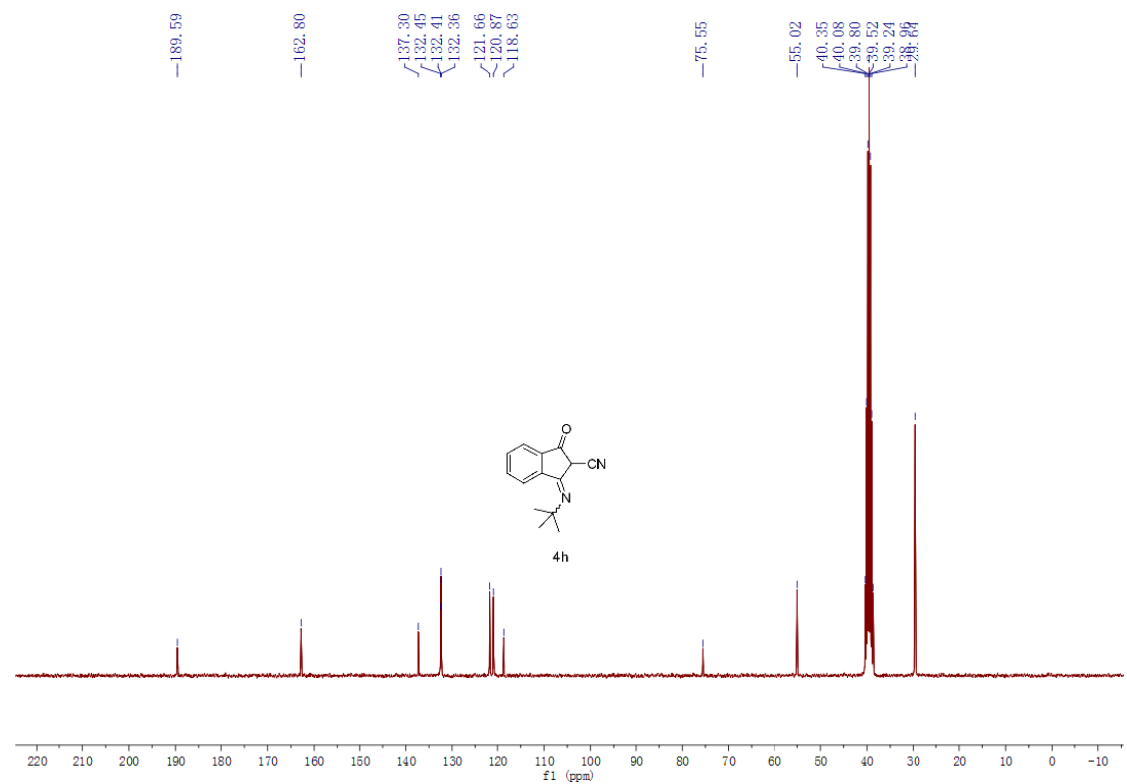

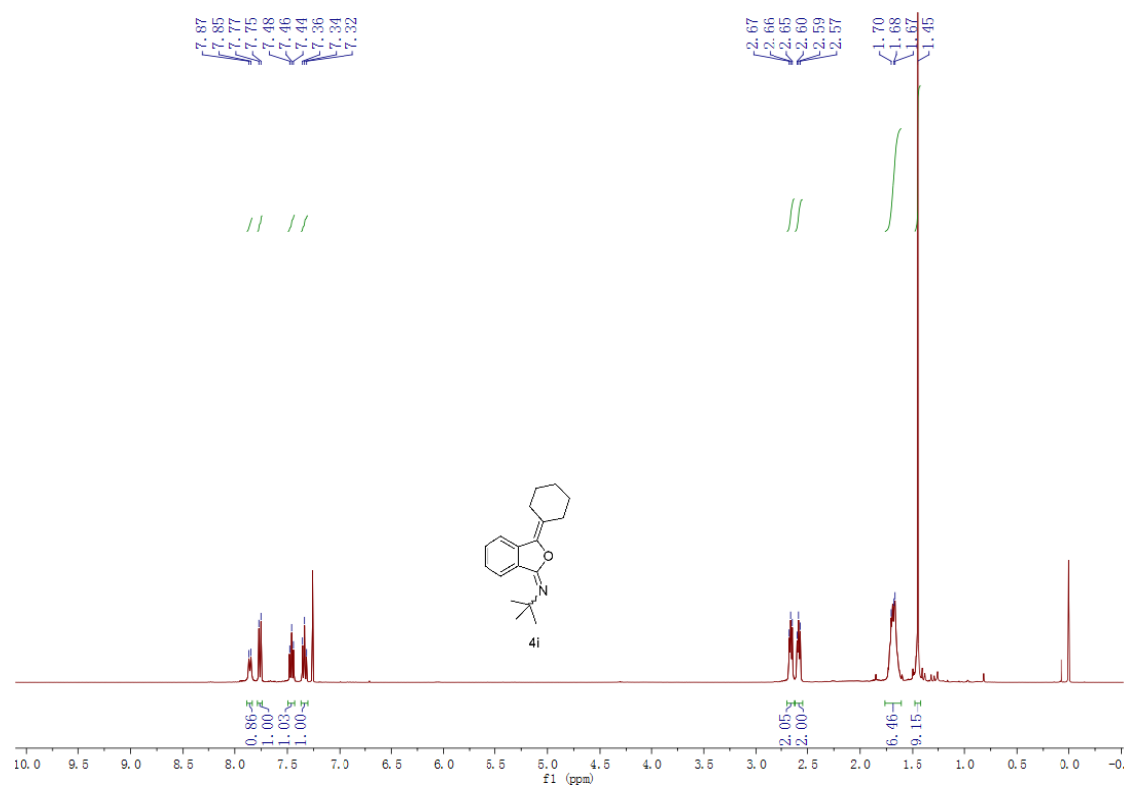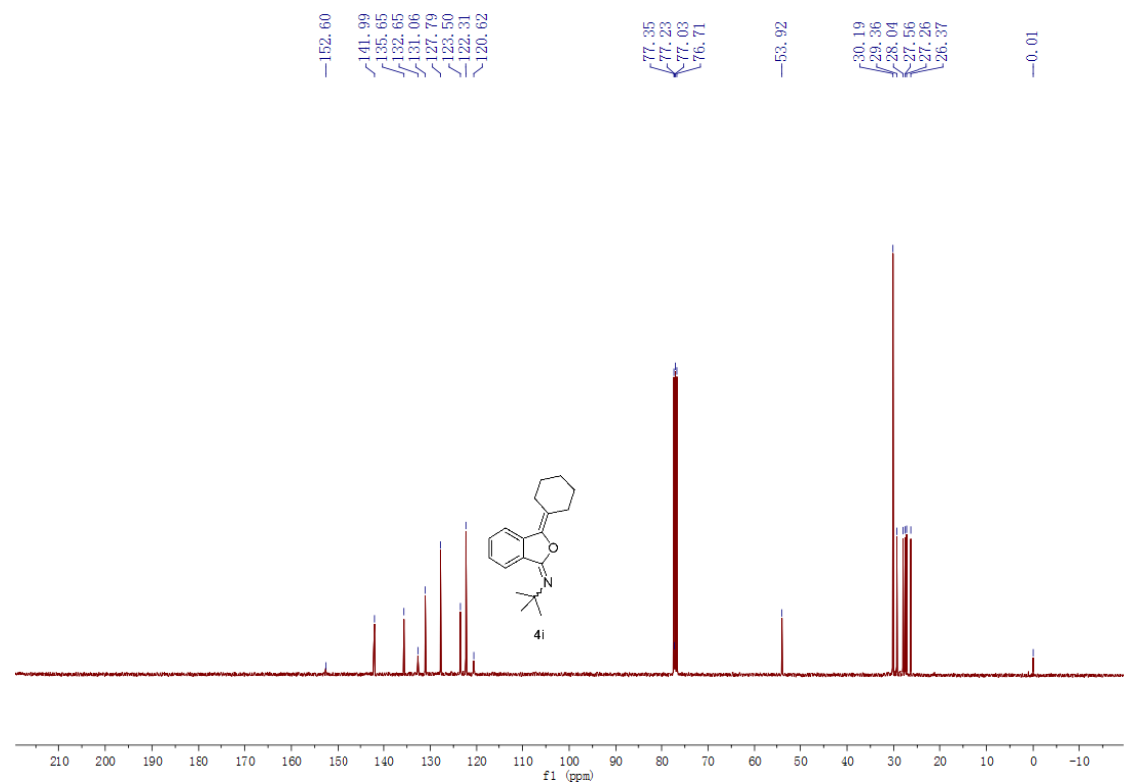

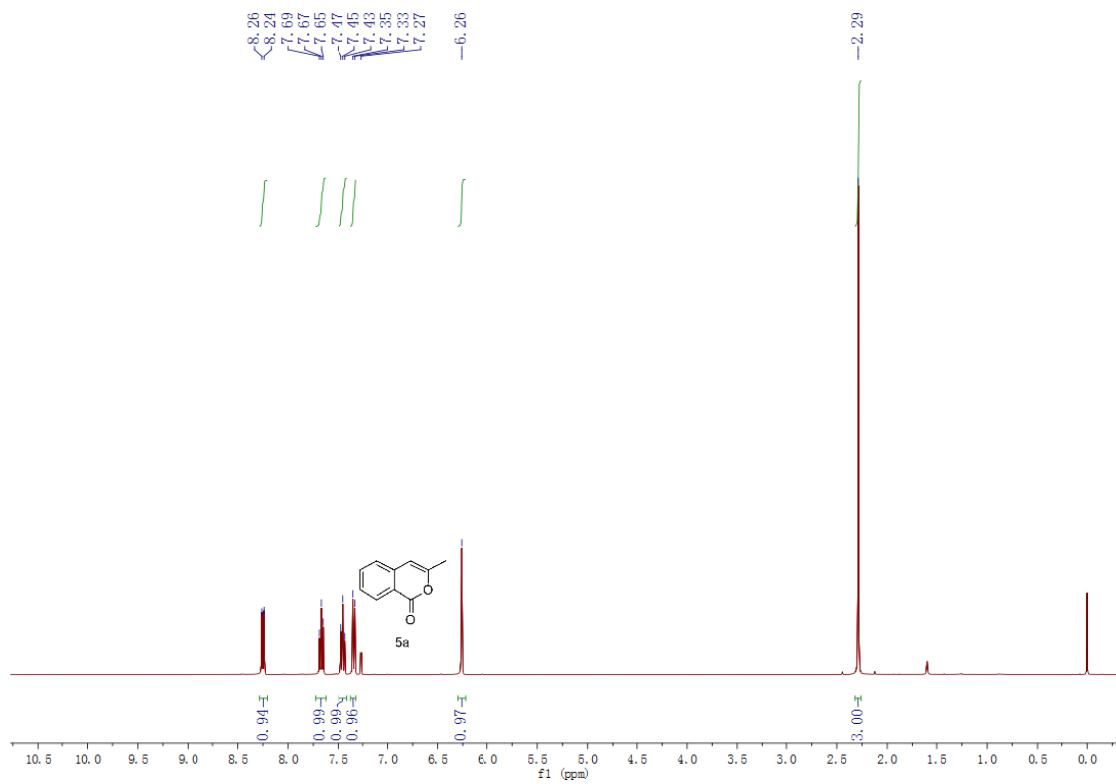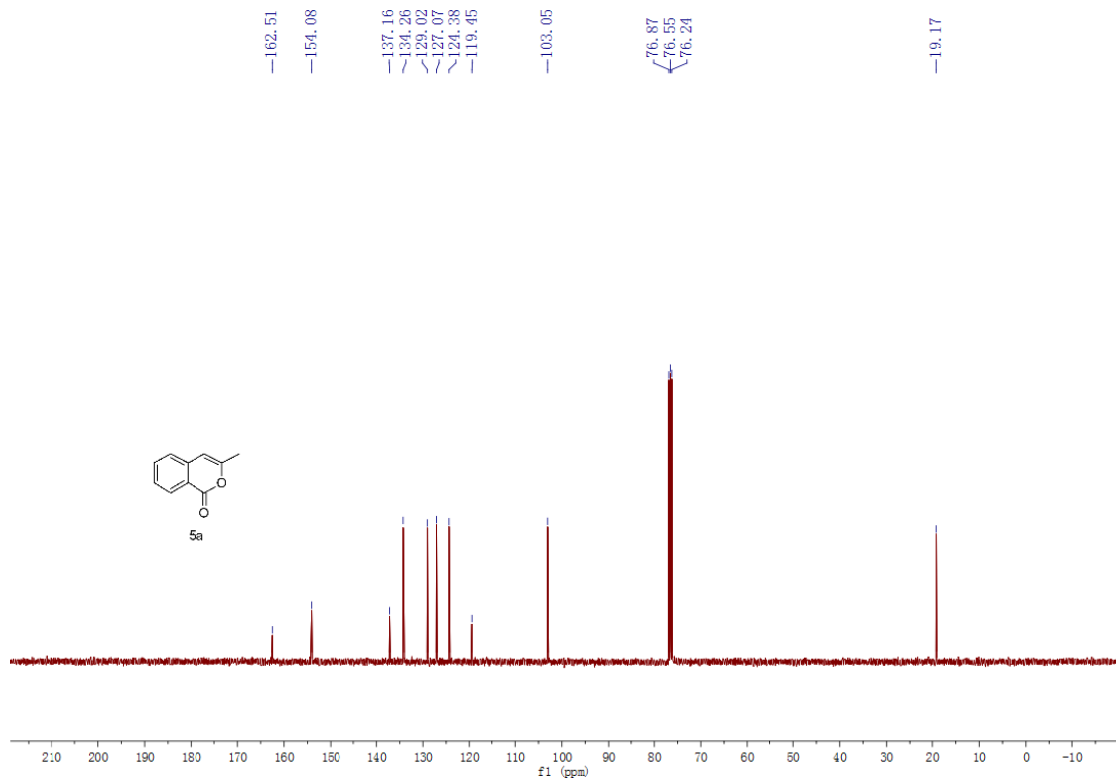

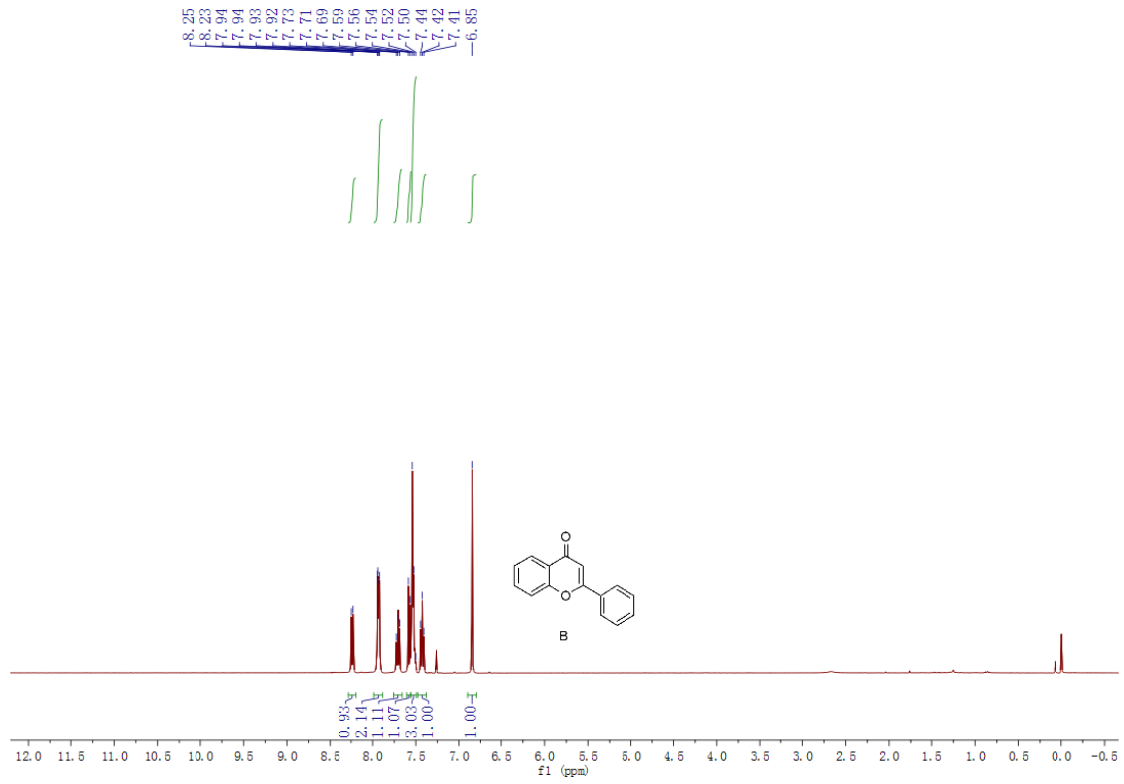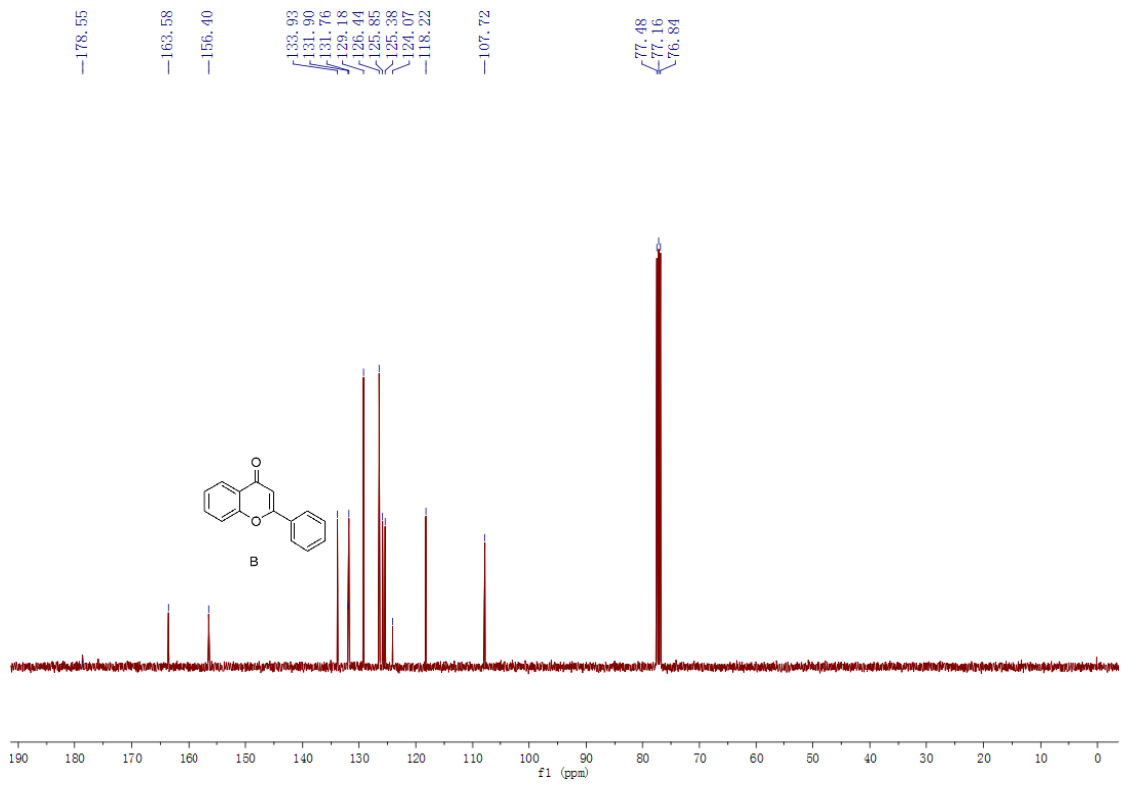

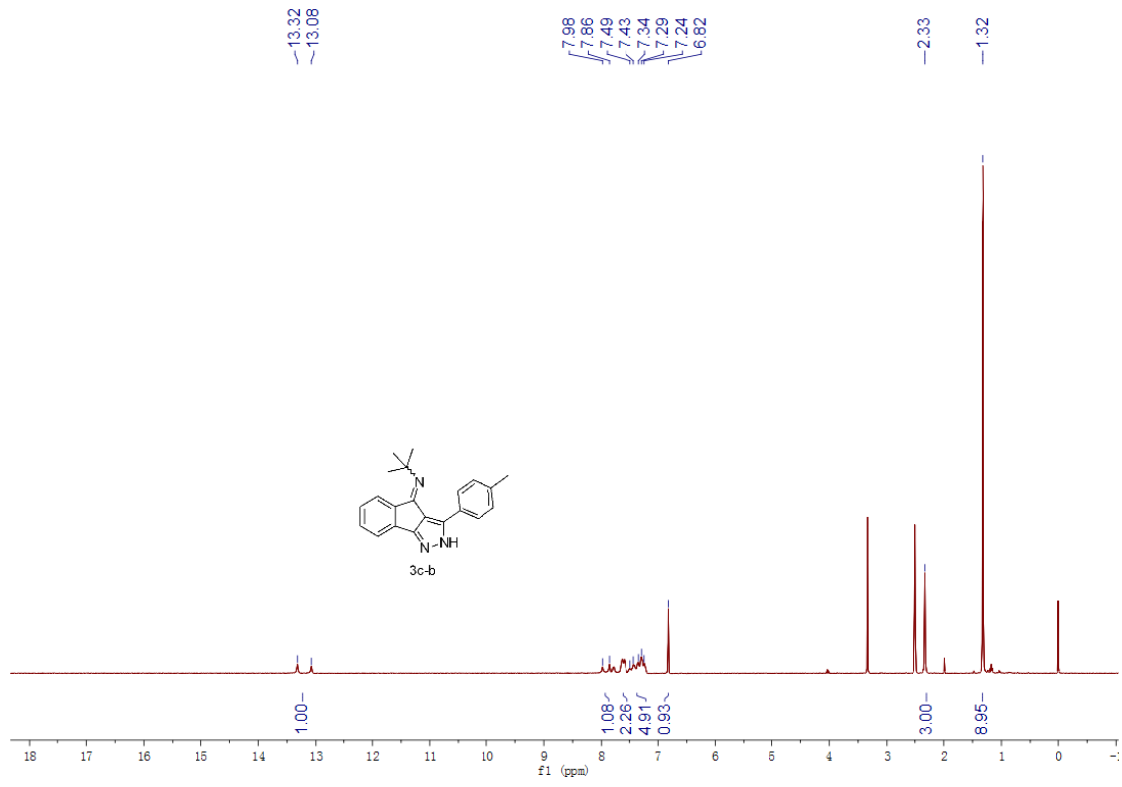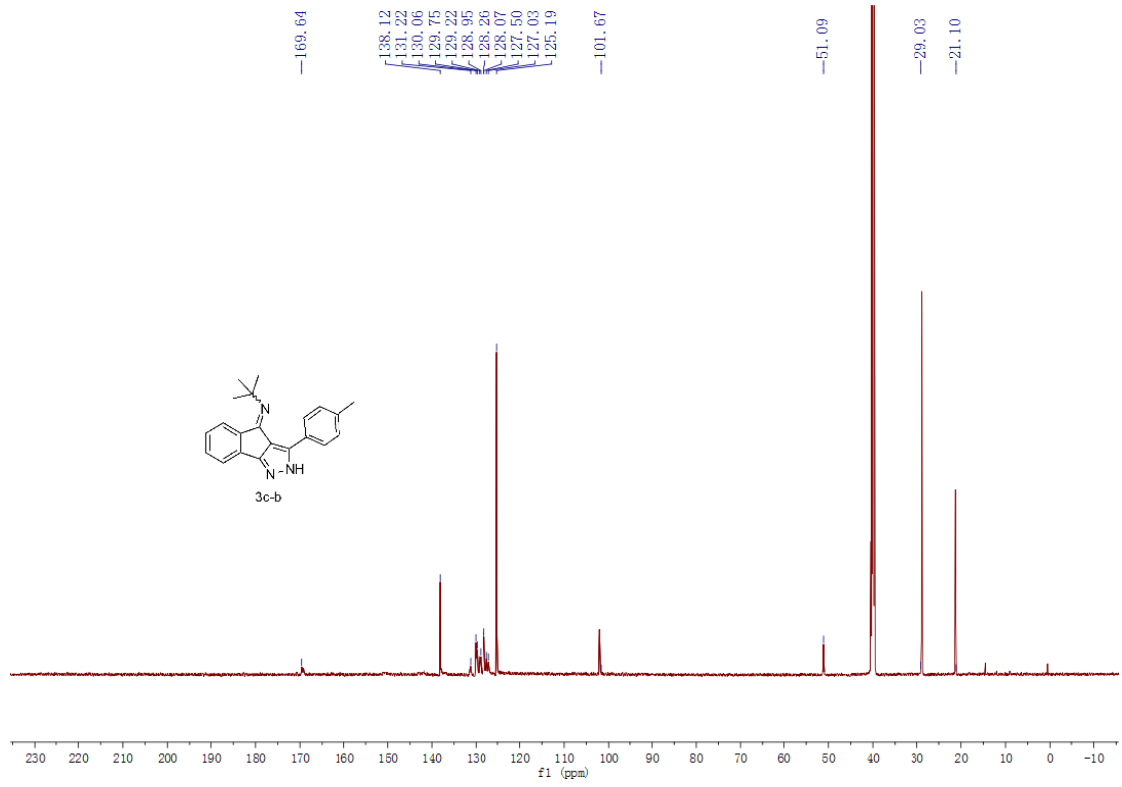

Supplement: c5ob00472a1.pdf [file c5ob00472a1.pdf]
